# Supplementary material for: Novel Indane Derivatives with Antioxidant Activity from the Roots of Anisodus tanguticus
Source: MDPI journal article supplement (doi:10.3390/molecules28031493), 2023-02-03
Supplement: s1 [file s1]

# Supplementary material

## Novel indane derivatives with antioxidant activity from the roots of *Anisodus tanguticus*

Chun-Wang Meng<sup>1,2,†</sup>, Hao-Yu Zhao<sup>1,2,†</sup>, Huan Zhu<sup>1,2</sup>, Cheng Peng<sup>1</sup>, Qin-Mei Zhou<sup>1,2,3,\*</sup> and Liang Xiong<sup>1,2,\*</sup>

<sup>1</sup> State Key Laboratory of Southwestern Chinese Medicine Resources, School of Pharmacy, Chengdu University of Traditional Chinese Medicine, Chengdu 611137, China

<sup>2</sup> Institute of Innovative Medicine Ingredients of Southwest Specialty Medicinal Materials, School of Pharmacy, Chengdu University of Traditional Chinese Medicine, Chengdu 611137, China

<sup>3</sup> Innovative Institute of Chinese Medicine and Pharmacy, Chengdu University of Traditional Chinese Medicine, Chengdu 611137, China

\* Correspondence: zhqmyx@sina.cn (Q.-M.Z); xiling@cdutcm.edu.cn (L.X.)

† These authors contributed equally to this work.

## The List of Contents

| No. | Content                                                                                                              | Page |
|-----|----------------------------------------------------------------------------------------------------------------------|------|
| 1   | <b>Text S1. ECD Calculation of Compound 2</b>                                                                        | S1   |
| 2   | <b>Figure S1.</b> $\omega$ B97XD/DGDZVP Optimized 18 Conformers of (2 <i>S</i> ,2' <i>S</i> )- <b>2</b>              | S1   |
| 3   | <b>Table S1.</b> Energy Analysis for the Conformers of (2 <i>S</i> ,2' <i>S</i> )- <b>2</b>                          | S2   |
| 4   | <b>Text S2. ECD Calculation of Compound 4</b>                                                                        | S3   |
| 5   | <b>Figure S2.</b> $\omega$ B97XD/DGDZVP Optimized 11 Conformers of (3 <i>R</i> ,3 <i>aS</i> ,8 <i>bS</i> )- <b>4</b> | S4   |
| 6   | <b>Table S2.</b> Energy Analysis for the Conformers of (3 <i>R</i> ,3 <i>aS</i> ,8 <i>bS</i> )- <b>4</b>             | S4   |
| 7   | <b>Figure S3.</b> The UV spectrum of compound <b>1</b> in MeCN                                                       | S6   |
| 8   | <b>Figure S4.</b> The IR Spectrum of Compound <b>1</b>                                                               | S7   |
| 9   | <b>Figure S5.</b> The (+)-HR-ESI-MS Spectroscopic Data of Compound <b>1</b>                                          | S8   |
| 10  | <b>Figure S6.</b> The $^1\text{H}$ NMR Spectrum of Compound <b>1</b> in Acetone- $d_6$                               | S9   |
| 11  | <b>Figure S7.</b> The $^{13}\text{C}$ NMR Spectrum of Compound <b>1</b> in Acetone- $d_6$                            | S10  |
| 12  | <b>Figure S8.</b> The DEPT Spectrum of Compound <b>1</b> in Acetone- $d_6$                                           | S11  |
| 13  | <b>Figure S9.</b> The HSQC Spectrum of Compound <b>1</b> in Acetone- $d_6$                                           | S12  |
| 14  | <b>Figure S10.</b> The $^1\text{H}$ - $^1\text{H}$ COSY Spectrum of Compound <b>1</b> in Acetone- $d_6$              | S13  |
| 15  | <b>Figure S11.</b> The HMBC Spectrum of Compound <b>1</b> in Acetone- $d_6$                                          | S14  |
| 16  | <b>Figure S12.</b> The UV spectrum of compound <b>2</b> in MeCN                                                      | S15  |
| 17  | <b>Figure S13.</b> The IR Spectrum of Compound <b>2</b>                                                              | S16  |
| 18  | <b>Figure S14.</b> The (+)-HR-ESI-MS Spectroscopic Data of Compound <b>2</b>                                         | S17  |
| 19  | <b>Figure S15.</b> The $^1\text{H}$ NMR Spectrum of Compound <b>2</b> in Acetone- $d_6$                              | S18  |
| 20  | <b>Figure S16.</b> The $^{13}\text{C}$ NMR Spectrum of Compound <b>2</b> in Acetone- $d_6$                           | S19  |
| 21  | <b>Figure S17.</b> The DEPT Spectrum of Compound <b>2</b> in Acetone- $d_6$                                          | S20  |
| 22  | <b>Figure S18.</b> The HSQC Spectrum of Compound <b>2</b> in Acetone- $d_6$                                          | S21  |
| 23  | <b>Figure S19.</b> The $^1\text{H}$ - $^1\text{H}$ gCOSY Spectrum of Compound <b>2</b> in Acetone- $d_6$             | S22  |
| 24  | <b>Figure S20.</b> The HMBC Spectrum of Compound <b>2</b> in Acetone- $d_6$                                          | S23  |
| 25  | <b>Figure S21.</b> The UV spectrum of compound <b>3</b> in MeCN                                                      | S24  |
| 26  | <b>Figure S22.</b> The IR Spectrum of Compound <b>3</b>                                                              | S25  |
| 27  | <b>Figure S23.</b> The (+)-HR-ESI-MS Spectroscopic Data of Compound <b>3</b>                                         | S26  |
| 28  | <b>Figure S24.</b> The $^1\text{H}$ NMR Spectrum of Compound <b>3</b> in Acetone- $d_6$                              | S27  |
| 29  | <b>Figure S25.</b> The $^{13}\text{C}$ NMR Spectrum of Compound <b>3</b> in Acetone- $d_6$                           | S28  |
| 30  | <b>Figure S26.</b> The DEPT Spectrum of Compound <b>3</b> in Acetone- $d_6$                                          | S29  |
| 31  | <b>Figure S27.</b> The edit-HSQC Spectrum of Compound <b>3</b> in Acetone- $d_6$                                     | S30  |
| 32  | <b>Figure S28.</b> The $^1\text{H}$ - $^1\text{H}$ COSY Spectrum of Compound <b>3</b> in Acetone- $d_6$              | S31  |
| 33  | <b>Figure S29.</b> The HMBC Spectrum of Compound <b>3</b> in Acetone- $d_6$                                          | S32  |
| 34  | <b>Figure S30.</b> The 1D NOE Spectrum of Compound <b>3</b> in Acetone- $d_6$                                        | S33  |
| 35  | <b>Figure S31.</b> The UV spectrum of compound <b>4</b> in MeCN                                                      | S34  |
| 36  | <b>Figure S32.</b> The IR Spectrum of Compound <b>4</b>                                                              | S35  |

---

|    |                                                                                                         |     |
|----|---------------------------------------------------------------------------------------------------------|-----|
| 37 | <b>Figure S33.</b> The (+)-HR-ESI-MS Spectroscopic Data of Compound <b>4</b>                            | S36 |
| 38 | <b>Figure S34.</b> The $^1\text{H}$ NMR Spectrum of Compound <b>4</b> in Acetone- $d_6$                 | S37 |
| 39 | <b>Figure S35.</b> The $^{13}\text{C}$ NMR Spectrum of Compound <b>4</b> in Acetone- $d_6$              | S38 |
| 40 | <b>Figure S36.</b> The DEPT Spectrum of Compound <b>4</b> in Acetone- $d_6$                             | S39 |
| 41 | <b>Figure S37.</b> The edit-HSQC Spectrum of Compound <b>4</b> in Acetone- $d_6$                        | S40 |
| 42 | <b>Figure S38.</b> The $^1\text{H}$ - $^1\text{H}$ COSY Spectrum of Compound <b>4</b> in Acetone- $d_6$ | S41 |
| 43 | <b>Figure S39.</b> The HMBC Spectrum of Compound <b>4</b> in Acetone- $d_6$                             | S42 |
| 44 | <b>Figure S40.</b> The 1D NOE Spectrum of Compound <b>4</b> in Acetone- $d_6$                           | S43 |

---

### Text S1. ECD Calculation of Compound 2.

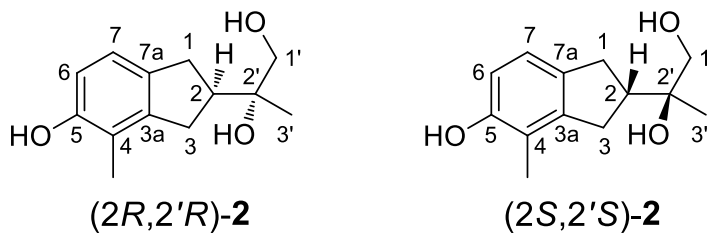

Conformation searches based on molecular mechanics with MMFF94s force field were performed for (2*S*,2'*S*)-**2** and gave 18 conformers (Boltzmann distribution  $\geq 1\%$ , Figure S1) [32,33]. The selected conformers were optimized using DFT at B3LYP/6-31G (d) level in vacuum with the Gaussian 16 program (Table S1) [34]. The B3LYP/6-31G (d)-optimized conformers (Boltzmann distribution  $\geq 1\%$ ) were then reoptimized at the  $\omega$ B97XD/DGDZVP level in acetonitrile. ECD computations for the  $\omega$ B97XD/DGDZVP-optimized conformers (Boltzmann distribution  $\geq 1\%$ ; Figure S1) were carried out at the CAM-B3LYP/DGDZVP level in acetonitrile [35]. Finally, according to the Boltzmann distribution theory and their relative Gibbs free energy ( $\Delta G$ ), the ECD spectrum for (2*S*,2'*S*)-**2** was generated using SpecDis 1.71 with  $\sigma = 0.25$  eV and a UV shift of +13 nm [36]. The corresponding theoretically ECD spectrum of (2*R*,2'*R*)-**2** was depicted by inverting that of (2*S*,2'*S*)-**2**. In the region of 190–300 nm, the theoretically calculated ECD spectrum of (2*R*,2'*R*)-**2** was in agreement with the experimental ECD spectrum of **2**.

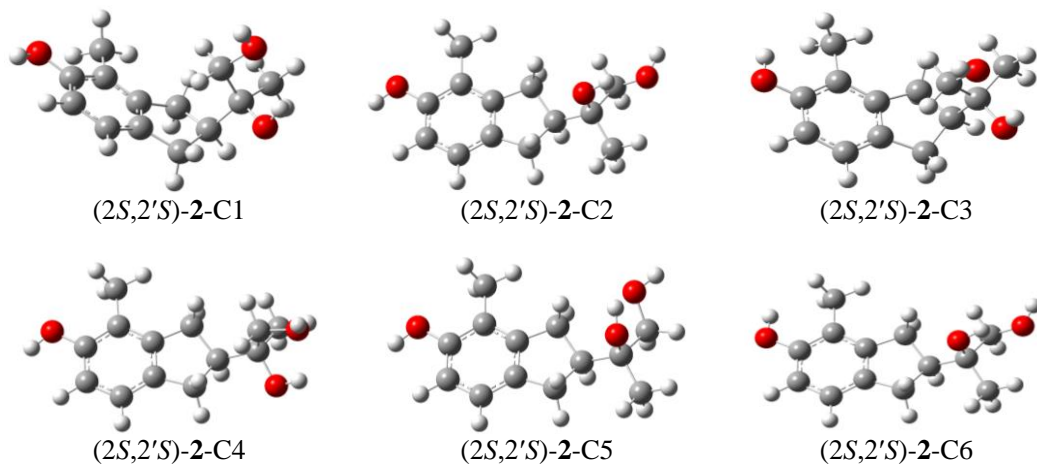

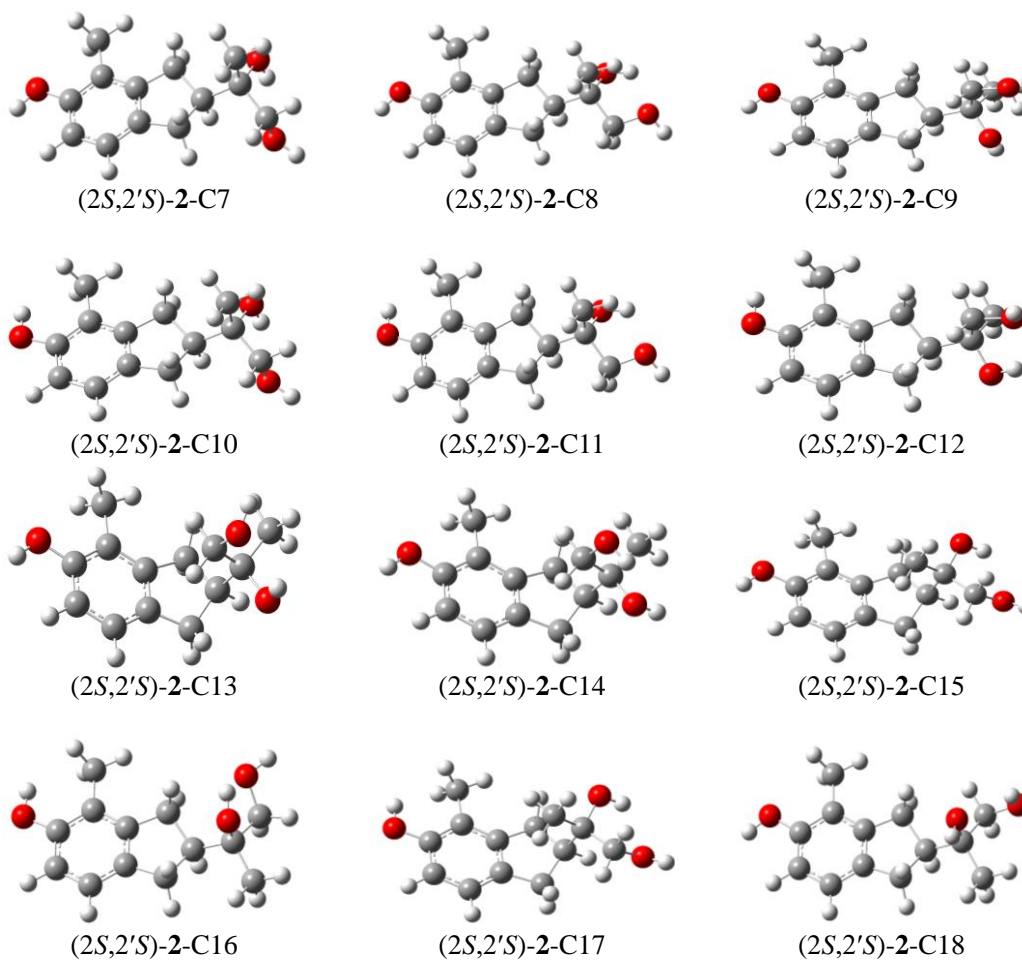

**Figure S1.**  $\omega$ B97XD/DGDZVP Optimized 18 Conformers of (2*S*,2'*S*)-2 (Boltzmann distribution  $\geq 1\%$ ).

**Table S1.** Energy Analysis for the Conformers of (2*S*,2'*S*)-2.

| Conf.                           | MMFF<br>energy           | B3LYP/6-31G(d) Gibbs free energy<br>(298.15 K) |                          |                           | $\omega$ B97XD/DGDZVP Gibbs free energy<br>(298.15 K) |                          |                           |
|---------------------------------|--------------------------|------------------------------------------------|--------------------------|---------------------------|-------------------------------------------------------|--------------------------|---------------------------|
|                                 | $\Delta E$<br>(Kcal/mol) | <i>G</i><br>(Hartree)                          | $\Delta G$<br>(Kcal/mol) | Boltzmann<br>Distribution | <i>G</i><br>(Hartree)                                 | $\Delta G$<br>(Kcal/mol) | Boltzmann<br>Distribution |
| (2 <i>S</i> ,2' <i>S</i> )-2-C1 | 0.0000                   | -731.631043                                    | 0.0000                   | 0.010                     | -731.503033                                           | 0.0000                   | 0.022                     |
| (2 <i>S</i> ,2' <i>S</i> )-2-C2 | 0.7631                   | -731.633726                                    | -1.6840                  | 0.173                     | -731.504547                                           | -0.9500                  | 0.110                     |
| (2 <i>S</i> ,2' <i>S</i> )-2-C3 | 0.7706                   | -731.629808                                    | 0.7750                   | 0.003                     | -731.502074                                           | 0.6020                   | 0.008                     |
| (2 <i>S</i> ,2' <i>S</i> )-2-C4 | 1.0133                   | -731.631526                                    | -0.3030                  | 0.017                     | -731.50302                                            | 0.0080                   | 0.022                     |
| (2 <i>S</i> ,2' <i>S</i> )-2-C5 | 1.3916                   | -731.632504                                    | -0.9170                  | 0.047                     | -731.503556                                           | -0.3280                  | 0.039                     |

|                                  |        |             |         |       |             |         |       |
|----------------------------------|--------|-------------|---------|-------|-------------|---------|-------|
| (2 <i>S</i> ,2' <i>S</i> )-2-C6  | 1.3958 | -731.632445 | -0.8800 | 0.045 | -731.503757 | -0.4540 | 0.048 |
| (2 <i>S</i> ,2' <i>S</i> )-2-C7  | 1.4891 | -731.632646 | -1.0060 | 0.055 | -731.504778 | -1.0950 | 0.141 |
| (2 <i>S</i> ,2' <i>S</i> )-2-C8  | 1.5820 | -731.632155 | -0.6980 | 0.033 | -731.503888 | -0.5370 | 0.055 |
| (2 <i>S</i> ,2' <i>S</i> )-2-C9  | 1.6115 | -731.632538 | -0.9380 | 0.049 | -731.503697 | -0.4170 | 0.045 |
| (2 <i>S</i> ,2' <i>S</i> )-2-C10 | 1.6928 | -731.631623 | -0.3640 | 0.019 | -731.503695 | -0.4150 | 0.045 |
| (2 <i>S</i> ,2' <i>S</i> )-2-C11 | 1.7104 | -731.631189 | -0.0920 | 0.012 | -731.502748 | 0.1790  | 0.016 |
| (2 <i>S</i> ,2' <i>S</i> )-2-C12 | 1.7298 | -731.630251 | 0.4970  | 0.004 | -731.501551 | 0.9300  | 0.005 |
| (2 <i>S</i> ,2' <i>S</i> )-2-C13 | 1.7839 | -731.631089 | -0.0290 | 0.011 | -731.502772 | 0.1640  | 0.017 |
| (2 <i>S</i> ,2' <i>S</i> )-2-C14 | 1.8334 | -731.631657 | -0.3850 | 0.019 | -731.503819 | -0.4930 | 0.051 |
| (2 <i>S</i> ,2' <i>S</i> )-2-C15 | 1.8721 | -731.63169  | -0.4060 | 0.020 | -731.504428 | -0.8750 | 0.097 |
| (2 <i>S</i> ,2' <i>S</i> )-2-C16 | 1.8844 | -731.631306 | -0.1650 | 0.013 | -731.502833 | 0.1260  | 0.018 |
| (2 <i>S</i> ,2' <i>S</i> )-2-C17 | 1.9952 | -731.630702 | 0.2140  | 0.007 | -731.503127 | -0.0590 | 0.025 |
| (2 <i>S</i> ,2' <i>S</i> )-2-C18 | 2.0082 | -731.634654 | -2.2660 | 0.463 | -731.505269 | -1.4030 | 0.237 |

### Text S2. ECD Calculation of Compound 4.

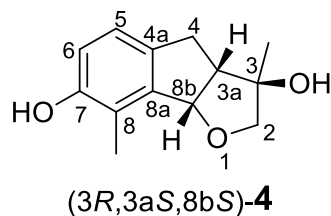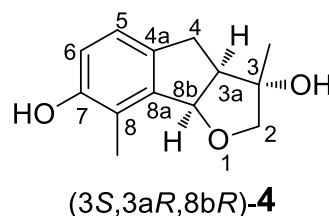

Conformation searches based on molecular mechanics with MMFF94s force field were performed for (3*R*,3*aS*,8*bS*)-4 and gave 11 conformers [32,33]. The selected conformers were optimized using DFT at B3LYP/6-31G (d) level in vacuum with the Gaussian 16 program (Table S2) [34]. The B3LYP/6-31G (d)-optimized conformers (Boltzmann distribution  $\geq 1\%$ ) were then reoptimized at the  $\omega$ B97XD/DGDZVP level in acetonitrile. ECD computations for the  $\omega$ B97XD/DGDZVP-optimized conformers (Boltzmann distribution  $\geq 1\%$ ; Figure S2) were carried out at the CAM-B3LYP/DGDZVP level in acetonitrile [35]. Finally, according to the Boltzmann distribution theory and their relative Gibbs

free energy ( $\Delta G$ ), the ECD spectrum for (3*R*,3*aS*,8*bS*)-**4** was generated using SpecDis 1.71 with  $\sigma = 0.25$  eV and a UV shift of +15 nm [36]. The corresponding theoretical ECD spectrum of (3*S*,3*aR*,8*bR*)-**4** was depicted by inverting that of (3*R*,3*aS*,8*bS*)-**4**. The theoretically calculated ECD spectrum of (3*S*,3*aR*,8*bR*)-**4** was in agreement with the experimental ECD spectrum of **4**.

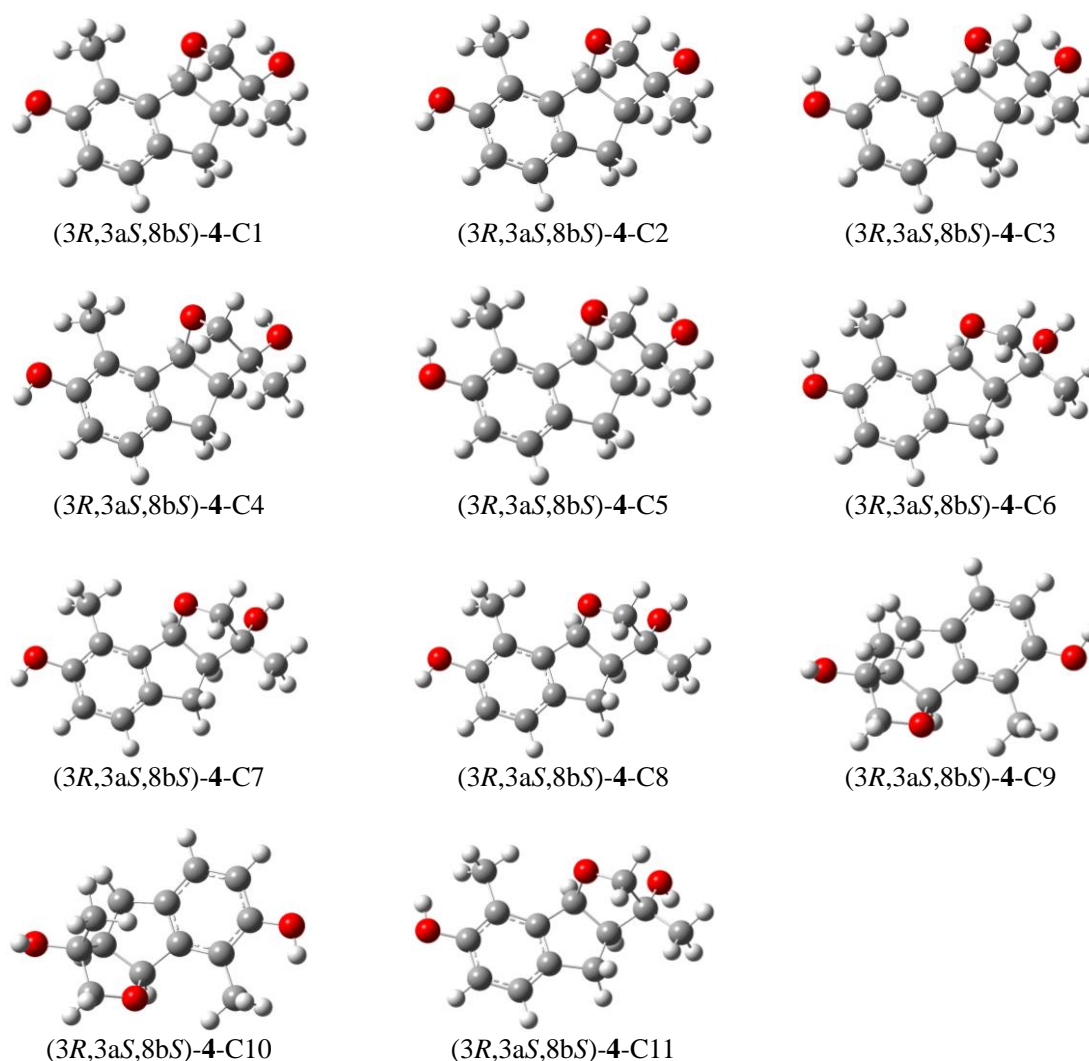

**Figure S2.**  $\omega$ B97XD/DGDZVP Optimized 11 Conformers of (3*R*,3*aS*,8*bS*)-**4** (Boltzmann distribution  $\geq 1\%$ ).

**Table S2.** Energy Analysis for the Conformers of (3*R*,3*aS*,8*bS*)-**4**.

| Conf. | MMFF<br>energy | B3LYP/6-31G(d) Gibbs free energy<br>(298.15 K) |            |           | $\omega$ B97XD/DGDZVP Gibbs free energy<br>(298.15 K) |            |           |
|-------|----------------|------------------------------------------------|------------|-----------|-------------------------------------------------------|------------|-----------|
|       |                | <i>G</i>                                       | $\Delta G$ | Boltzmann | <i>G</i>                                              | $\Delta G$ | Boltzmann |
|       | $\Delta E$     |                                                |            |           |                                                       |            |           |

|                                                        | (Kcal/mol) | (Hartree)   | (Kcal/mol) | Distribution | (Hartree)   | (Kcal/mol) | Distribution |
|--------------------------------------------------------|------------|-------------|------------|--------------|-------------|------------|--------------|
| (3 <i>R</i> ,3 <i>aS</i> ,8 <i>bS</i> )- <b>4</b> -C1  | 0.0000     | -730.447328 | 0.0000     | 0.227        | -730.312657 | 0.0000     | 0.196        |
| (3 <i>R</i> ,3 <i>aS</i> ,8 <i>bS</i> )- <b>4</b> -C2  | 0.0056     | -730.447328 | 0.0000     | 0.227        | -730.312661 | -0.0030    | 0.196        |
| (3 <i>R</i> ,3 <i>aS</i> ,8 <i>bS</i> )- <b>4</b> -C3  | 0.1000     | -730.446837 | 0.3080     | 0.135        | -730.311746 | 0.5720     | 0.075        |
| (3 <i>R</i> ,3 <i>aS</i> ,8 <i>bS</i> )- <b>4</b> -C4  | 0.7462     | -730.447328 | 0.0000     | 0.227        | -730.312664 | -0.0040    | 0.197        |
| (3 <i>R</i> ,3 <i>aS</i> ,8 <i>bS</i> )- <b>4</b> -C5  | 0.8230     | -730.446835 | 0.3090     | 0.135        | -730.311755 | 0.5660     | 0.075        |
| (3 <i>R</i> ,3 <i>aS</i> ,8 <i>bS</i> )- <b>4</b> -C6  | 0.9569     | -730.444569 | 1.7310     | 0.012        | -730.311104 | 0.9750     | 0.038        |
| (3 <i>R</i> ,3 <i>aS</i> ,8 <i>bS</i> )- <b>4</b> -C7  | 1.0530     | -730.444755 | 1.6150     | 0.015        | -730.311916 | 0.4650     | 0.089        |
| (3 <i>R</i> ,3 <i>aS</i> ,8 <i>bS</i> )- <b>4</b> -C8  | 1.1136     | -730.444758 | 1.6130     | 0.015        | -730.311916 | 0.4650     | 0.089        |
| (3 <i>R</i> ,3 <i>aS</i> ,8 <i>bS</i> )- <b>4</b> -C9  | 1.6685     | -730.442817 | 2.8310     | 0.002        | -730.309812 | 1.7850     | 0.010        |
| (3 <i>R</i> ,3 <i>aS</i> ,8 <i>bS</i> )- <b>4</b> -C10 | 1.6758     | -730.44256  | 2.9920     | 0.001        | -730.309139 | 2.2080     | 0.005        |
| (3 <i>R</i> ,3 <i>aS</i> ,8 <i>bS</i> )- <b>4</b> -C11 | 1.7977     | -730.443671 | 2.2950     | 0.005        | -730.310904 | 1.1000     | 0.031        |



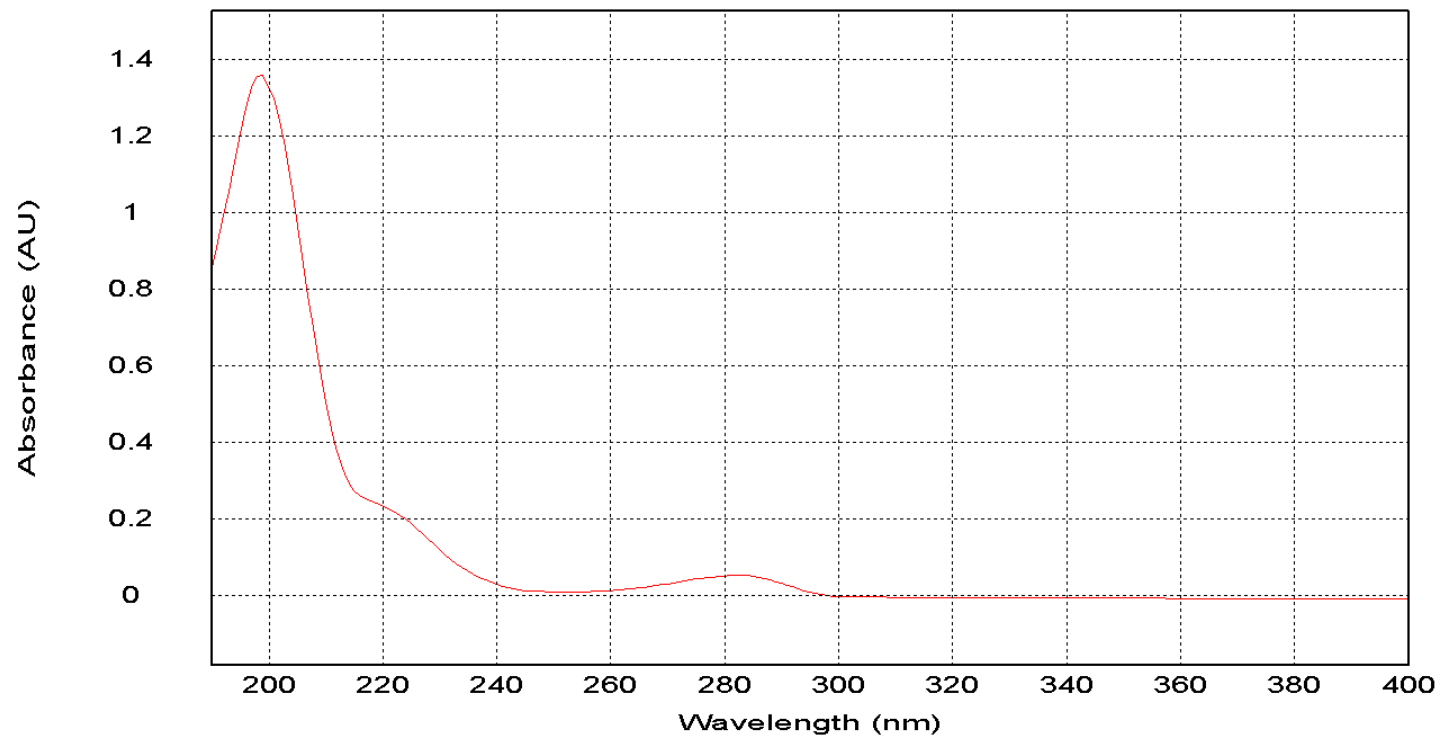

**Figure S3.** The UV spectrum of compound **1** in MeCN.

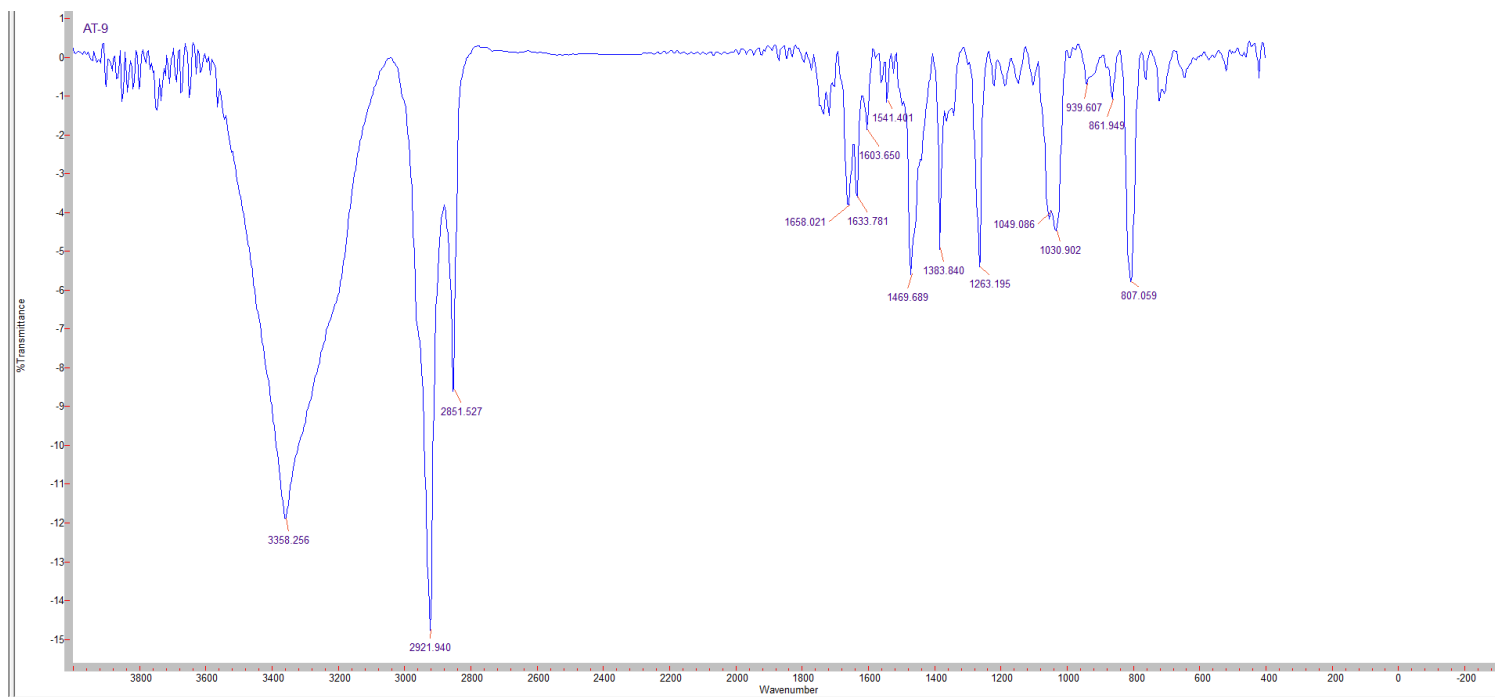

**Figure S4.** The IR Spectrum of Compound 1.

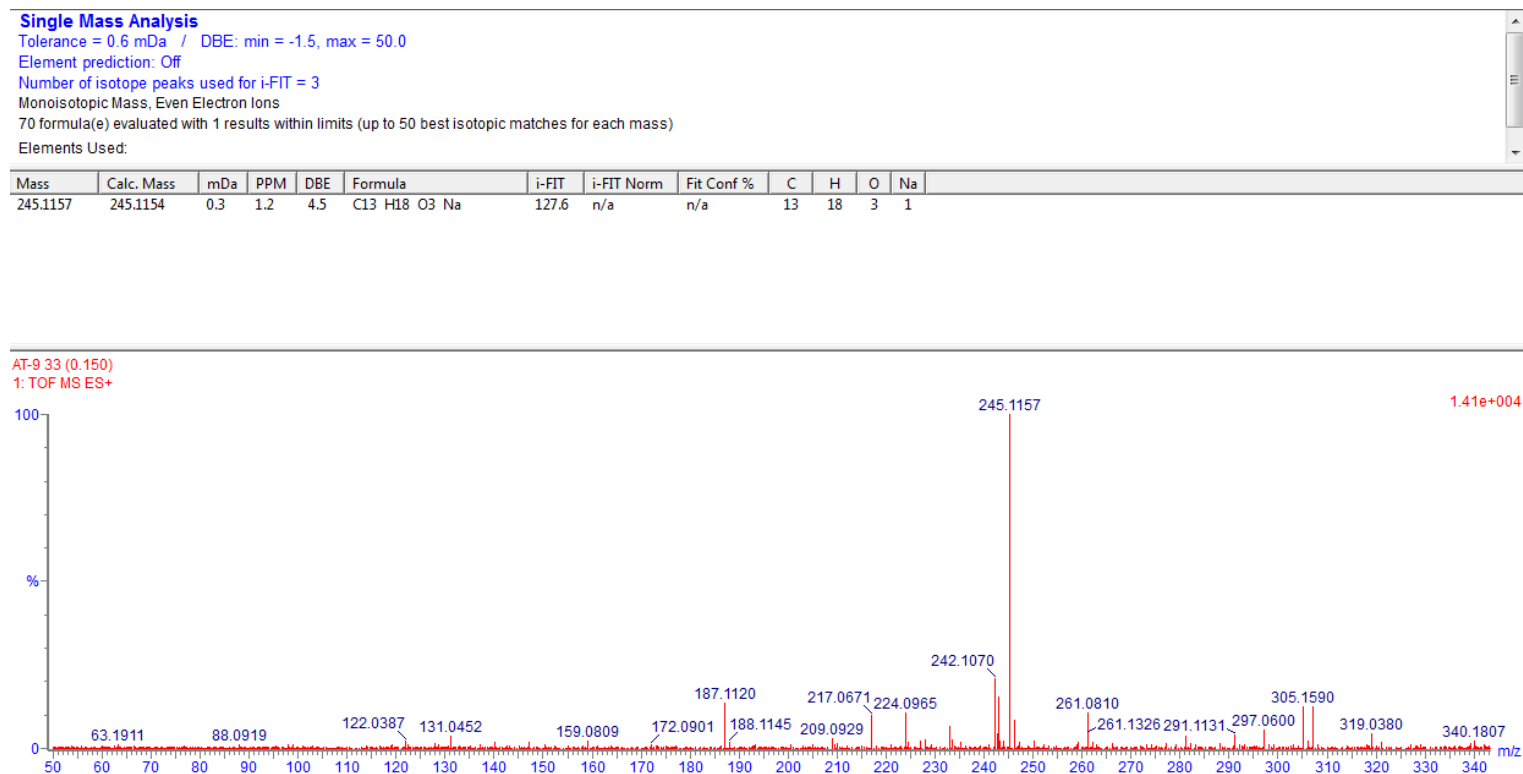

**Figure S5.** The (+)-HR-ESI-MS Spectroscopic Data of Compound **1**.

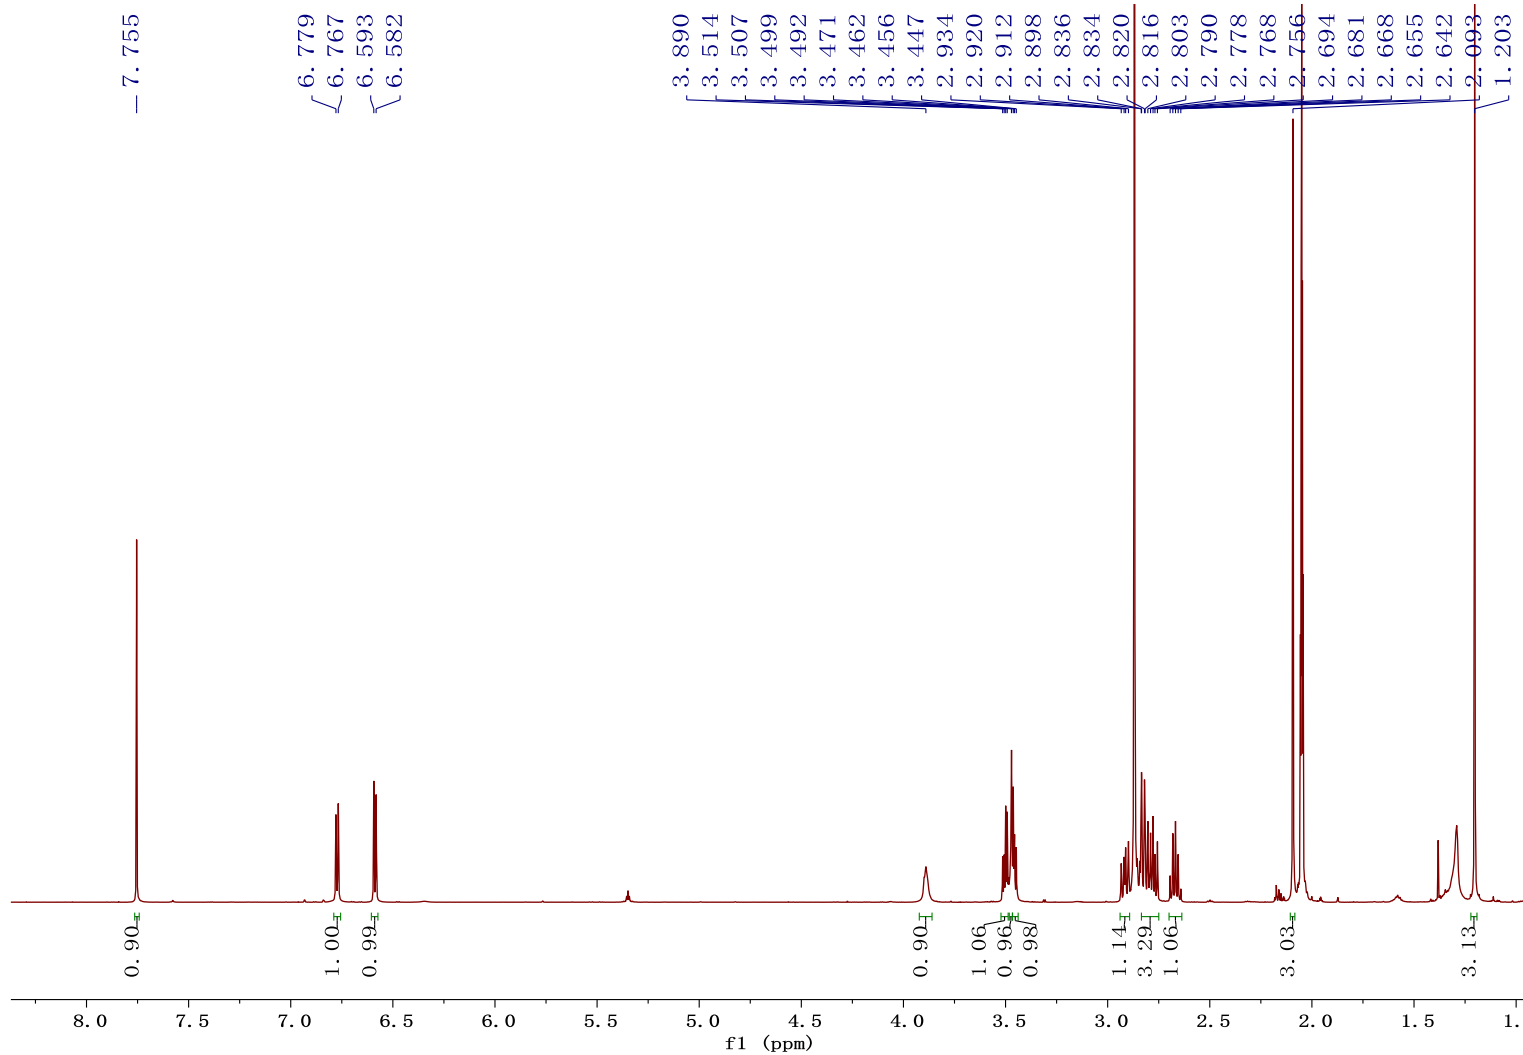

**Figure S6.** The  $^1\text{H}$  NMR Spectrum of Compound **1** in  $\text{Acetone-}d_6$ .

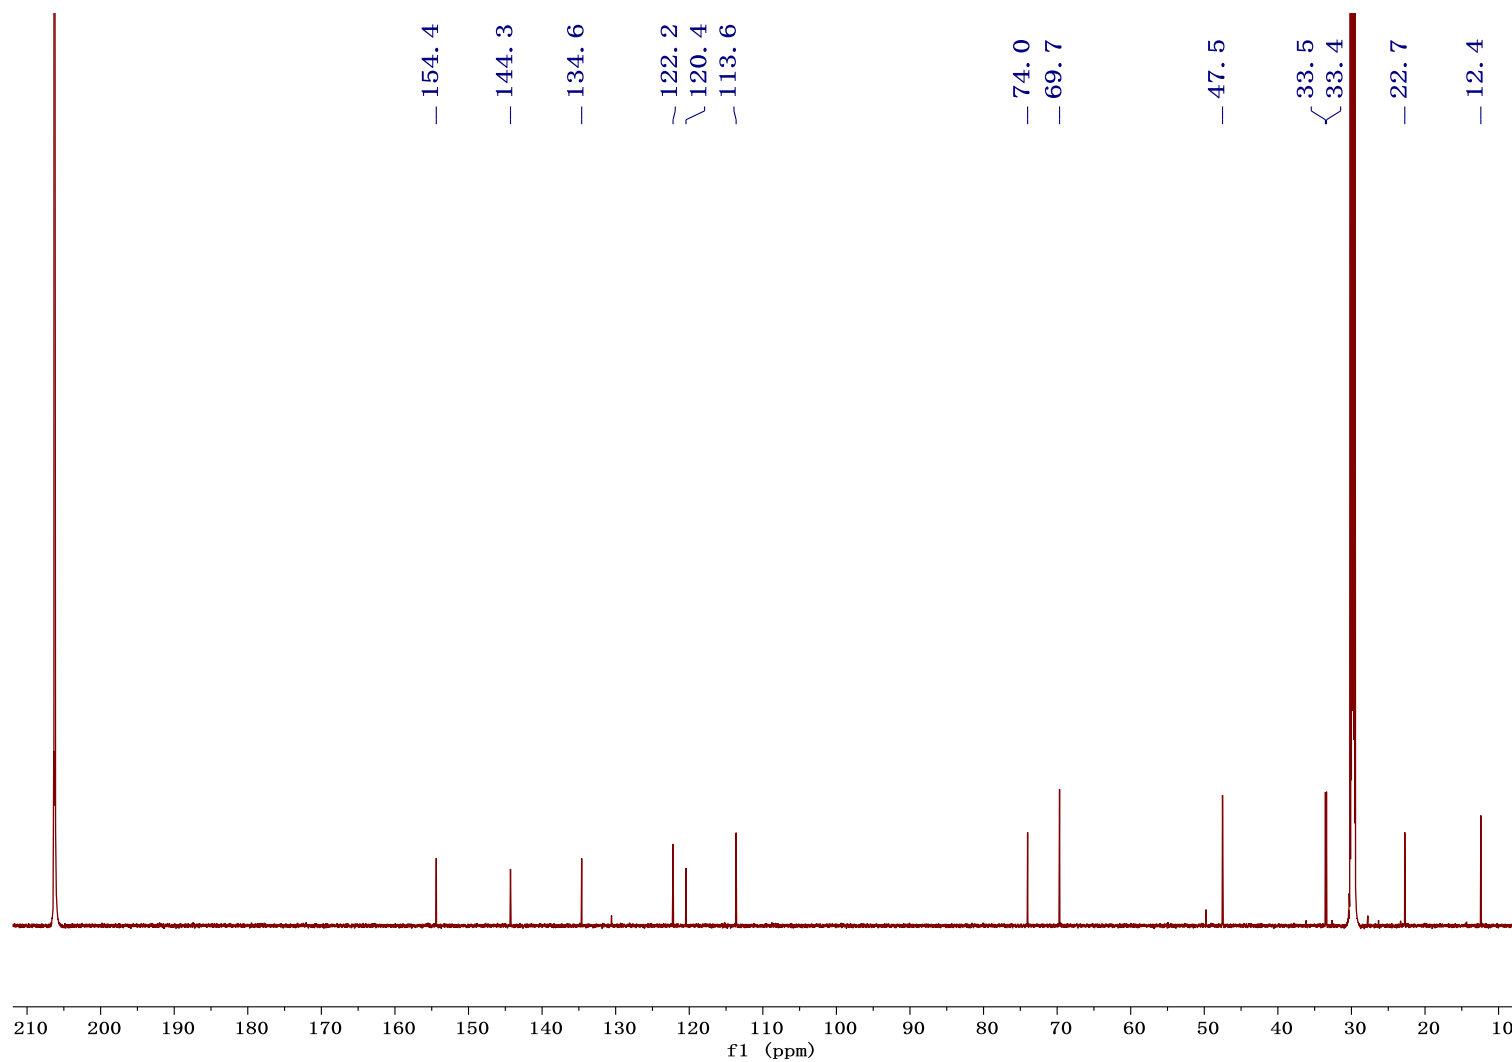

**Figure S7.** The <sup>13</sup>C NMR Spectrum of Compound **1** in Acetone-*d*<sub>6</sub>.

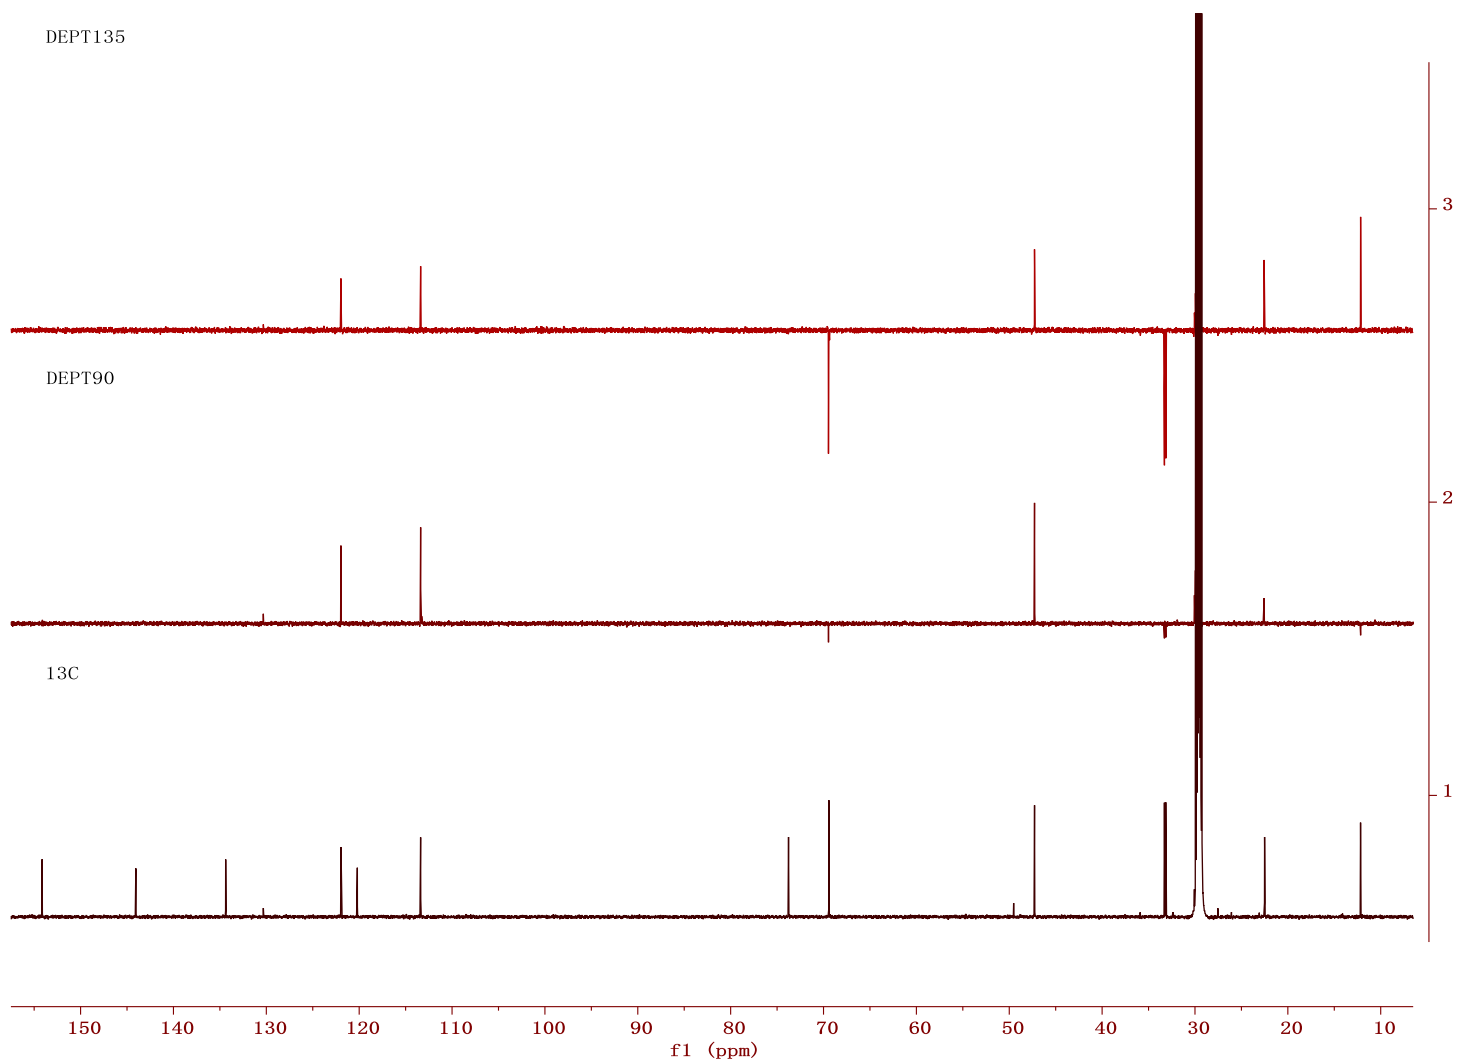

**Figure S8.** The DEPT Spectrum of Compound **1** in Acetone- $d_6$ .

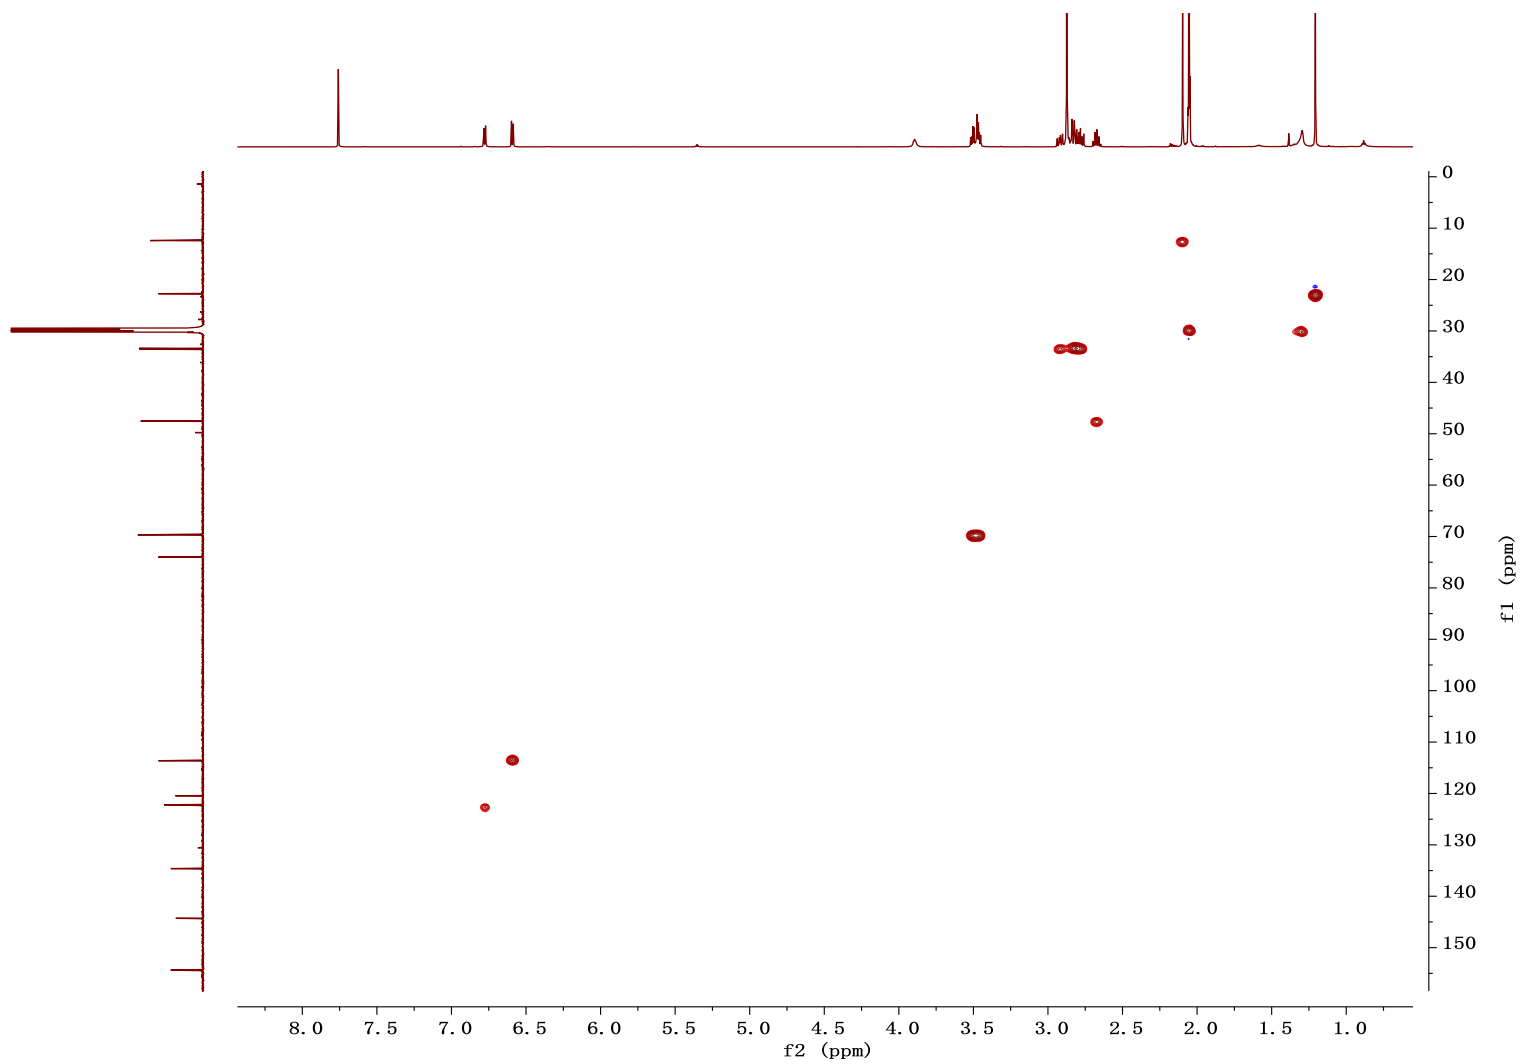

**Figure S9.** The HSQC Spectrum of Compound **1** in Acetone- $d_6$ .





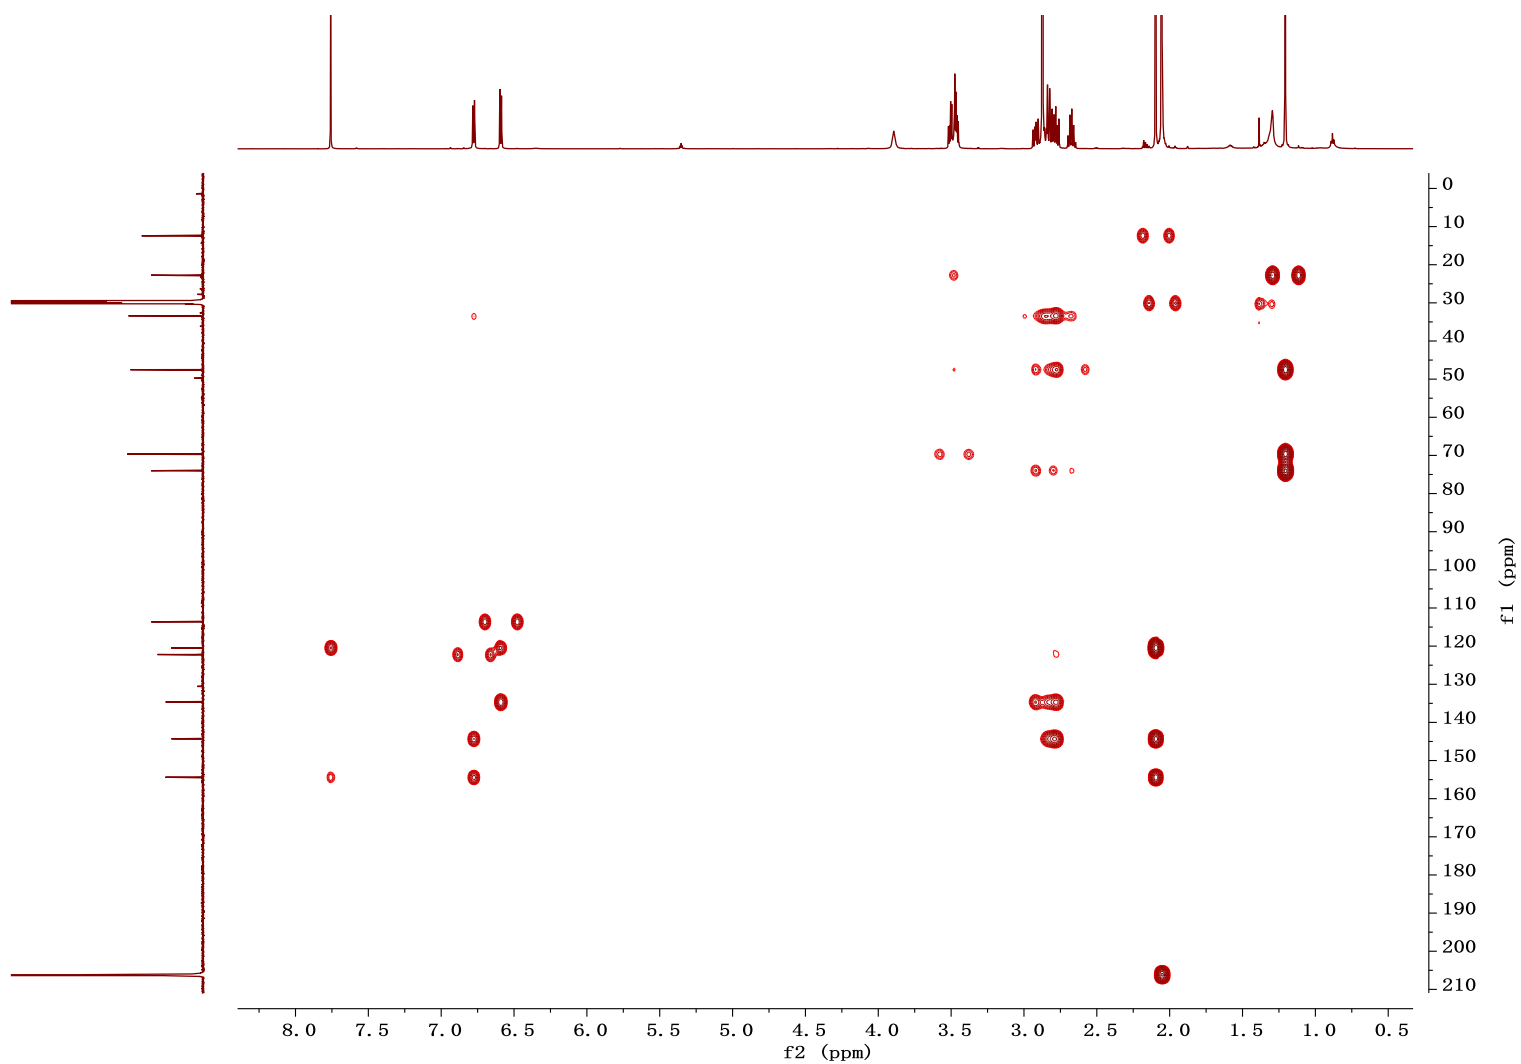

**Figure S11.** The HMBC Spectrum of Compound **1** in Acetone- $d_6$ .

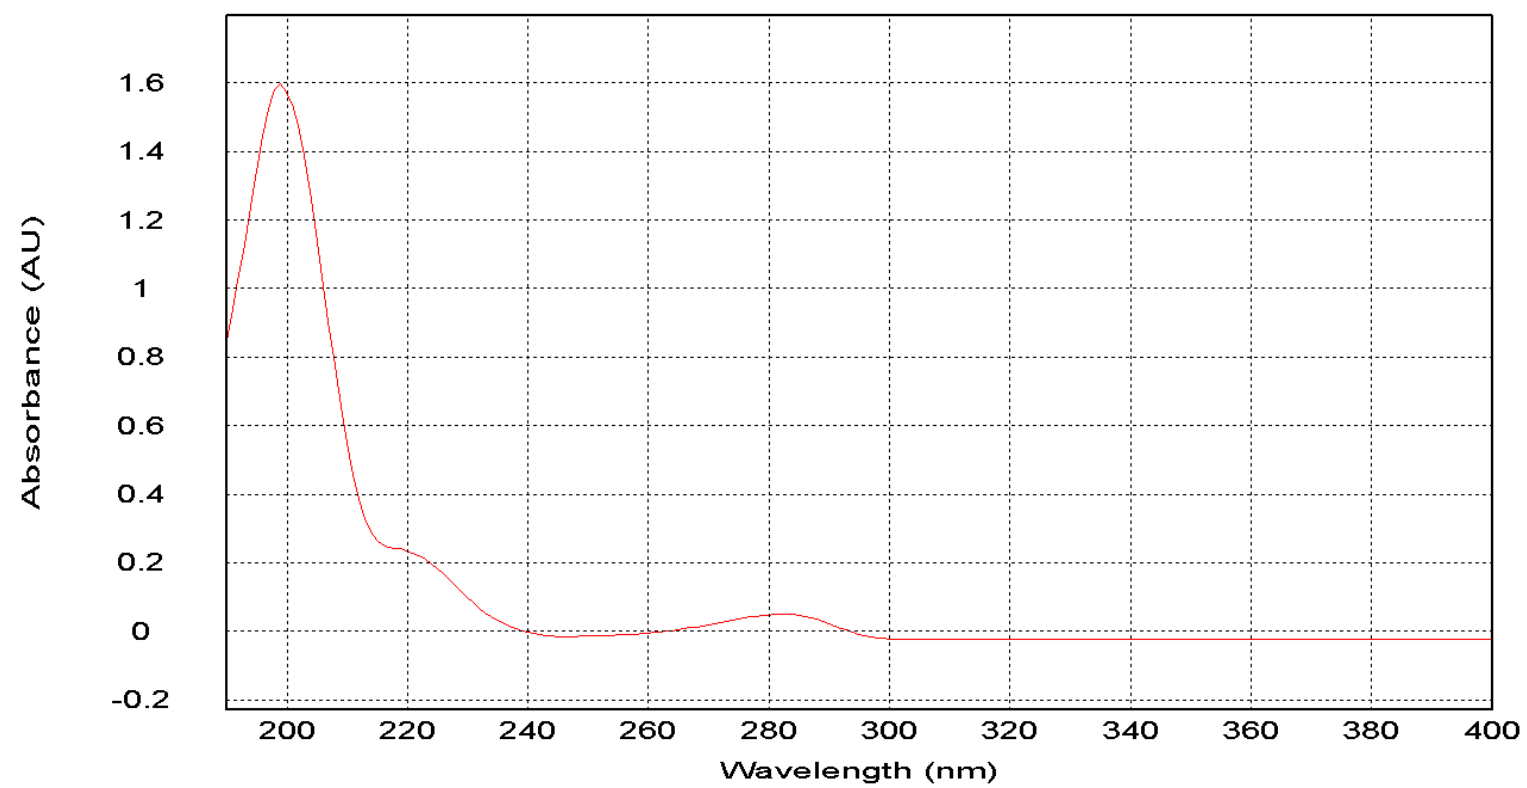

**Figure S12.** The UV spectrum of compound **2** in MeCN.

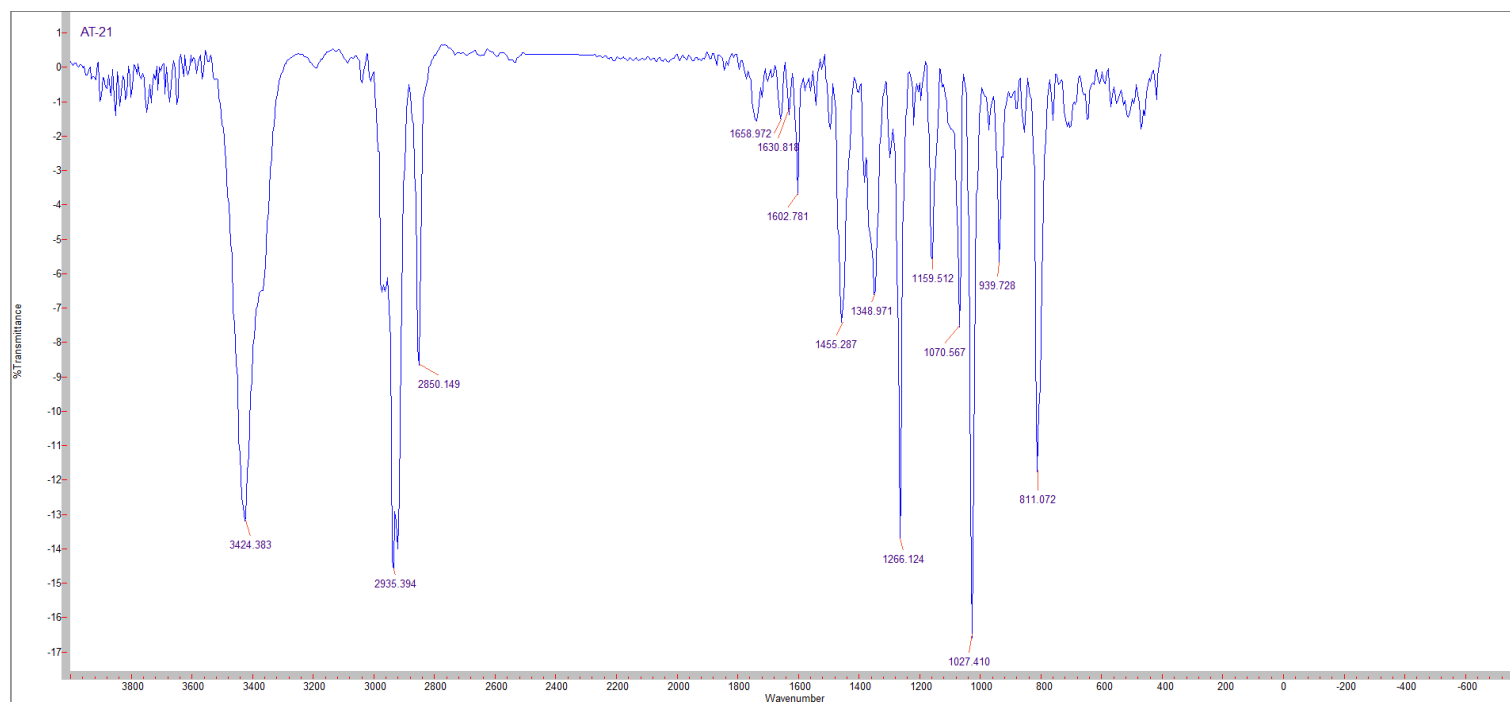

**Figure S13.** The IR Spectrum of Compound **2**.

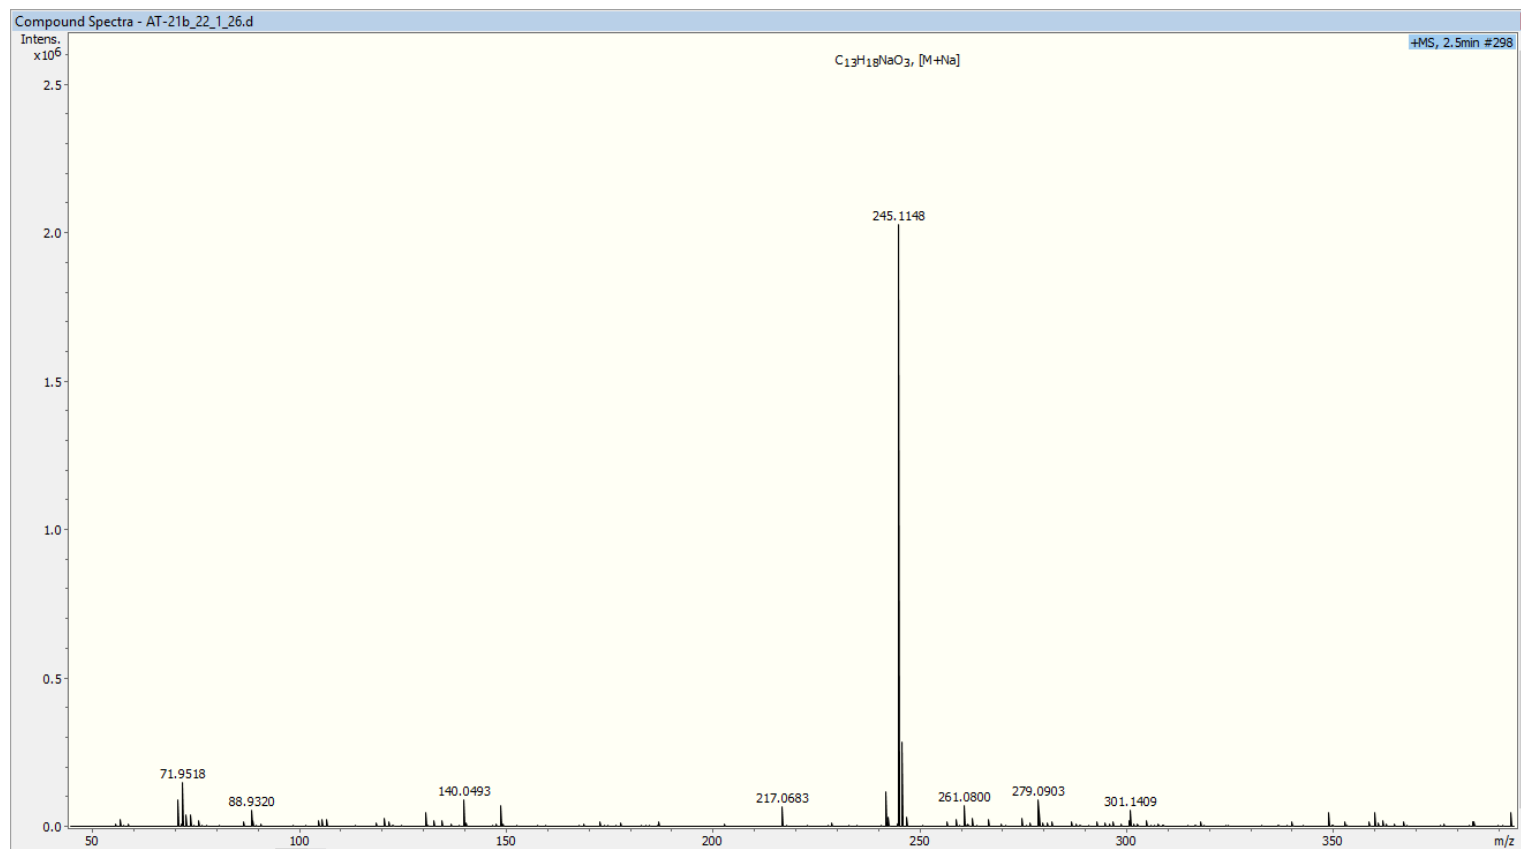

**Figure S14.** The (+)-HR-ESI-MS Spectroscopic Data of Compound **2**.

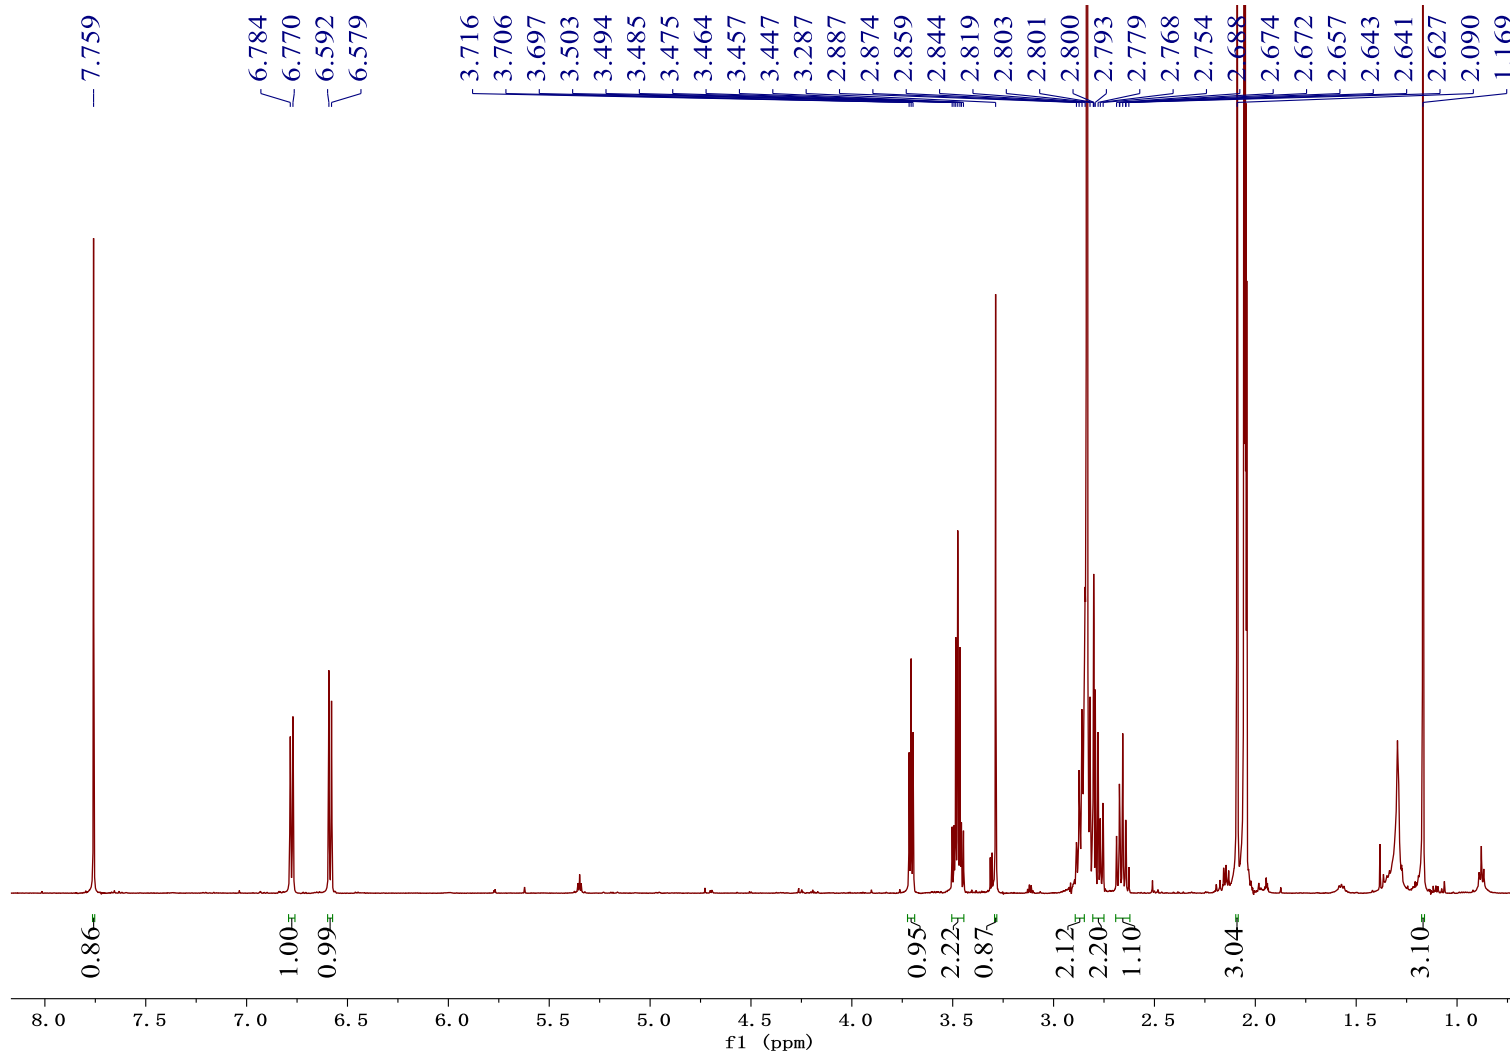

**Figure S15.** The <sup>1</sup>H NMR Spectrum of Compound **2** in Acetone-*d*<sub>6</sub>.

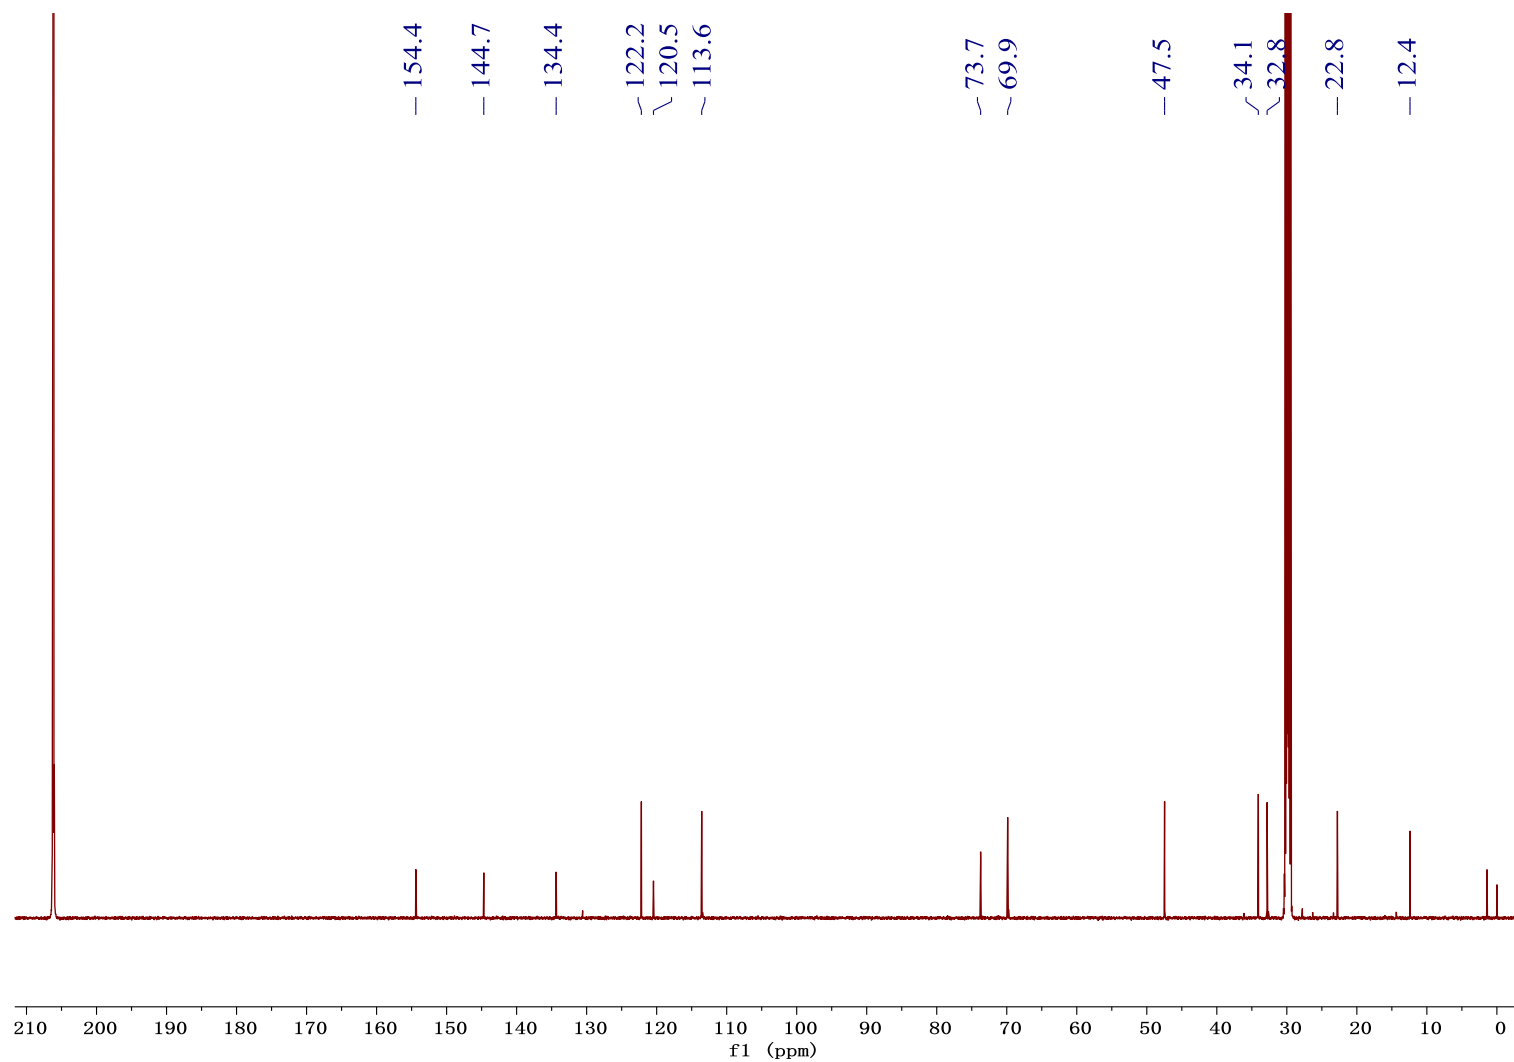

**Figure S16.** The <sup>13</sup>C NMR Spectrum of Compound **2** in Acetone-*d*<sub>6</sub>.

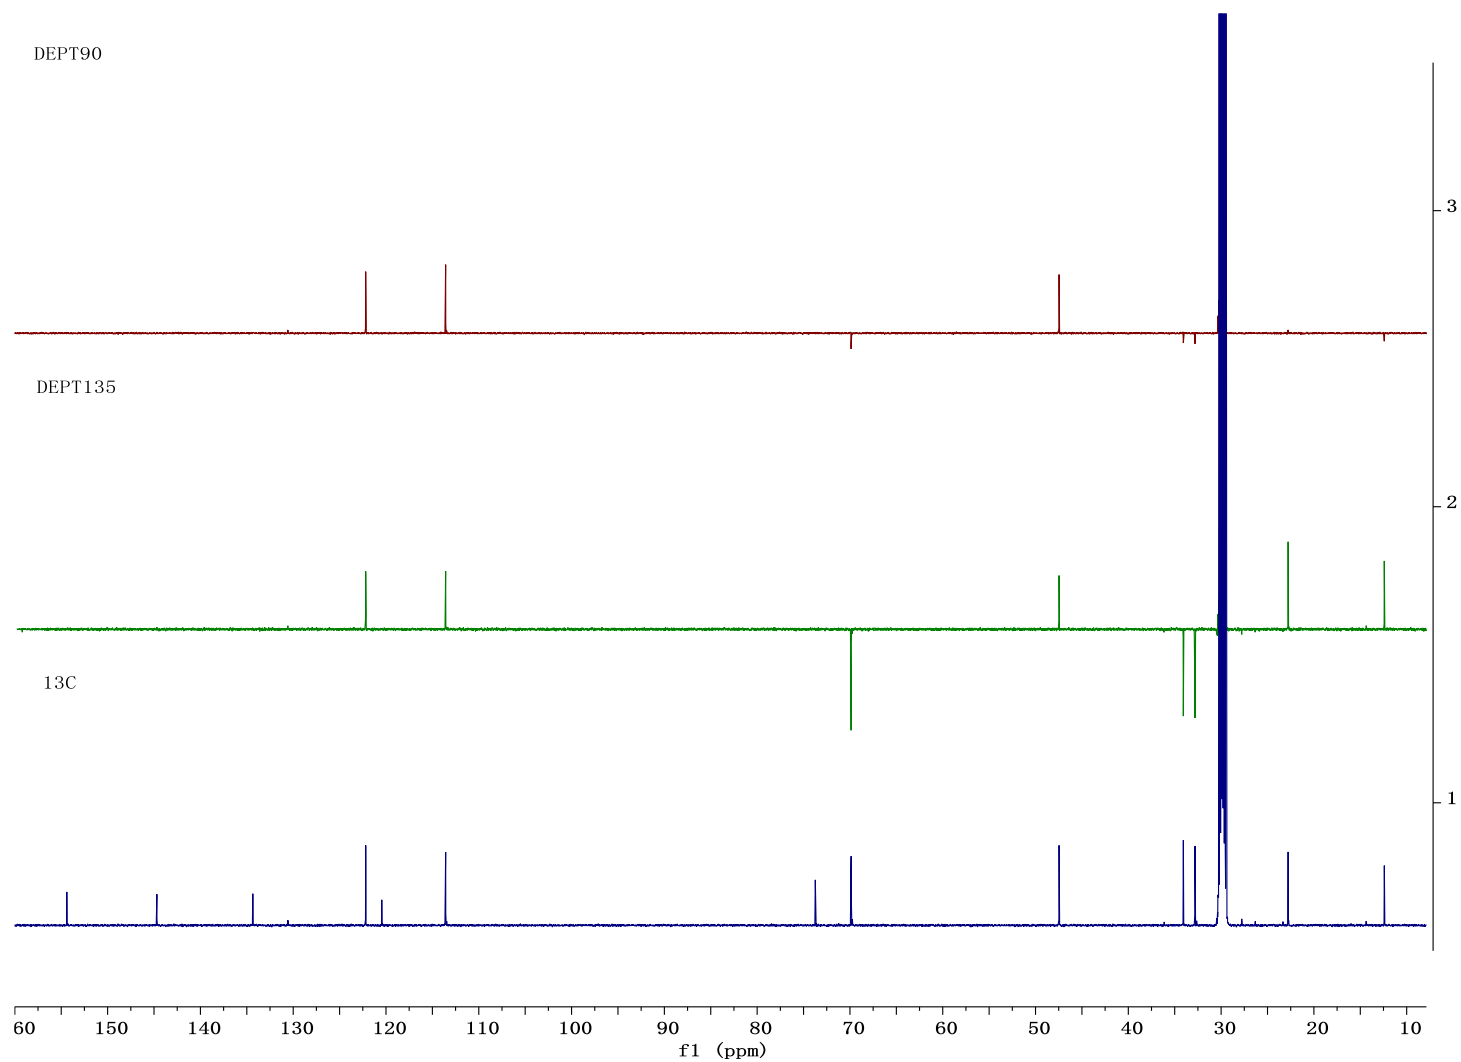

**Figure S17.** The DEPT Spectrum of Compound **2** in Acetone- $d_6$ .

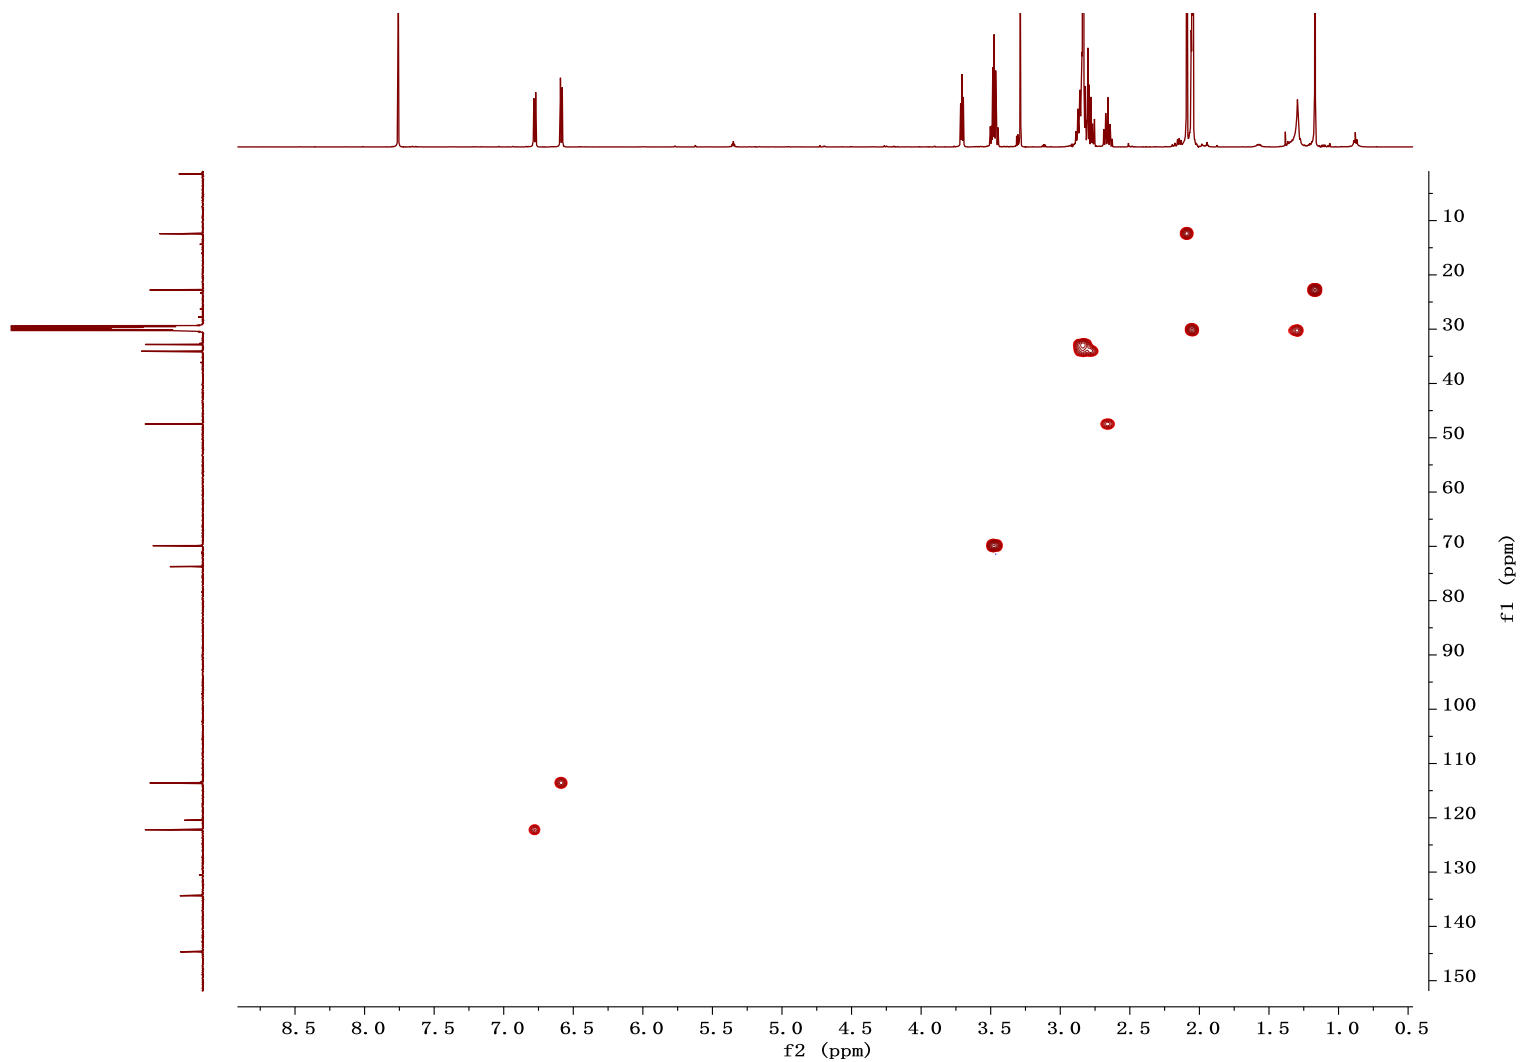

**Figure S18.** The HSQC Spectrum of Compound **2** in Acetone-*d*<sub>6</sub>.



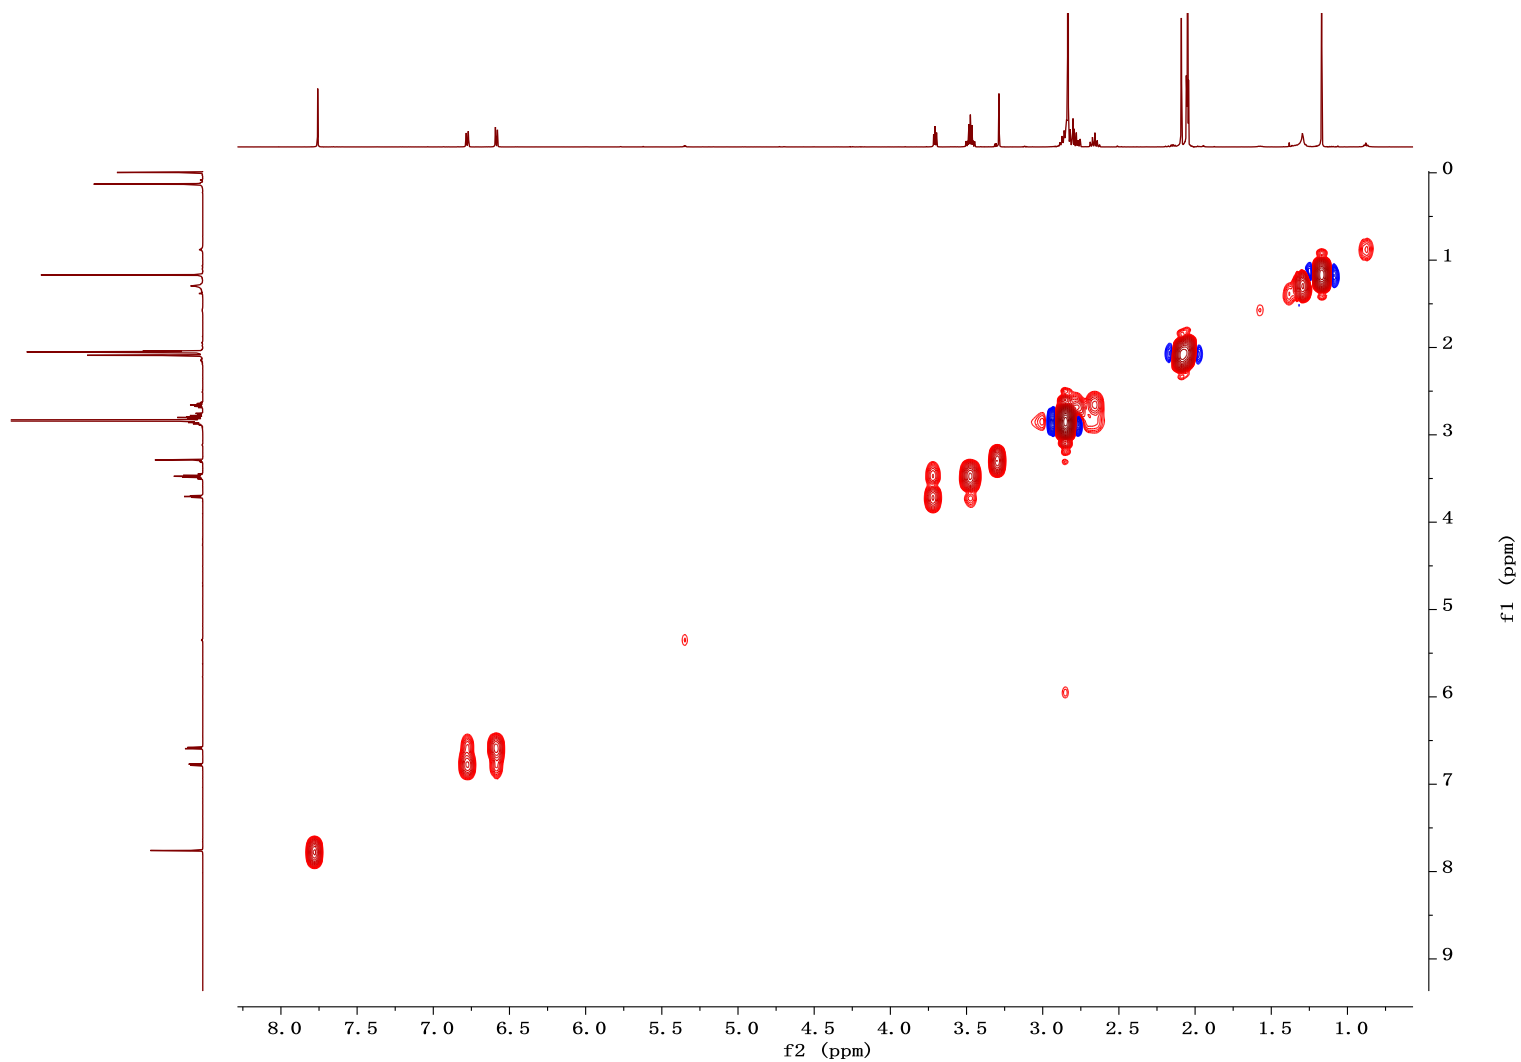

**Figure S19.** The  $^1\text{H}$ - $^1\text{H}$  COSY Spectrum of Compound **2** in  $\text{Acetone-}d_6$ .

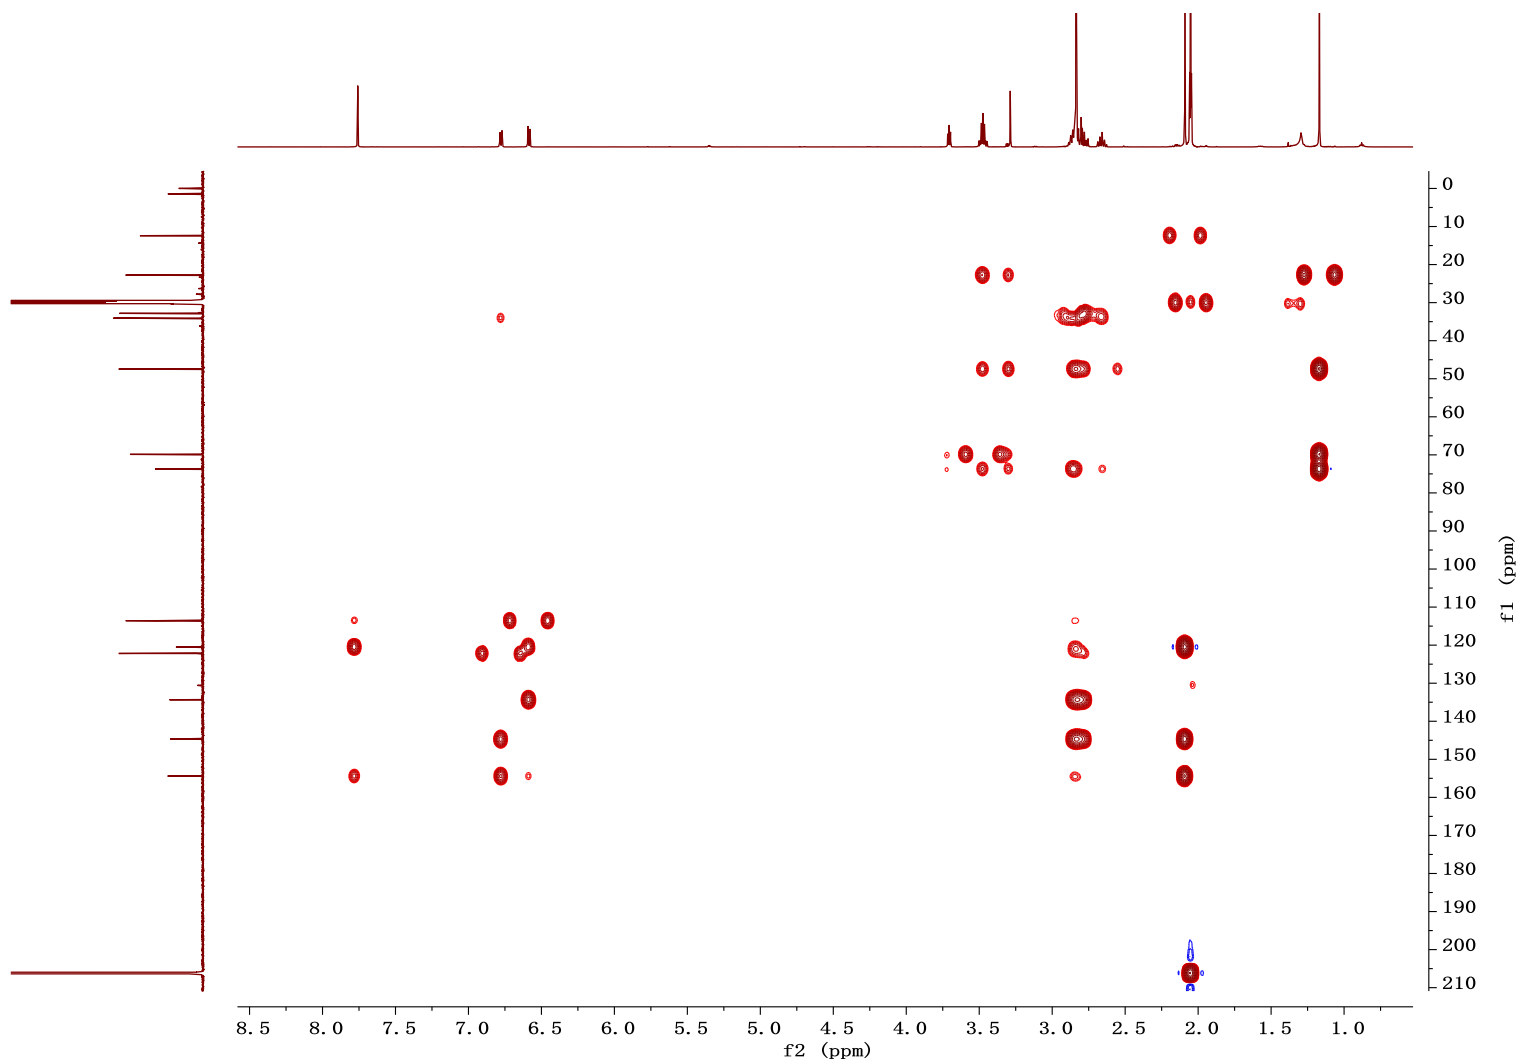

**Figure S20.** The HMBC Spectrum of Compound **2** in Acetone- $d_6$ .

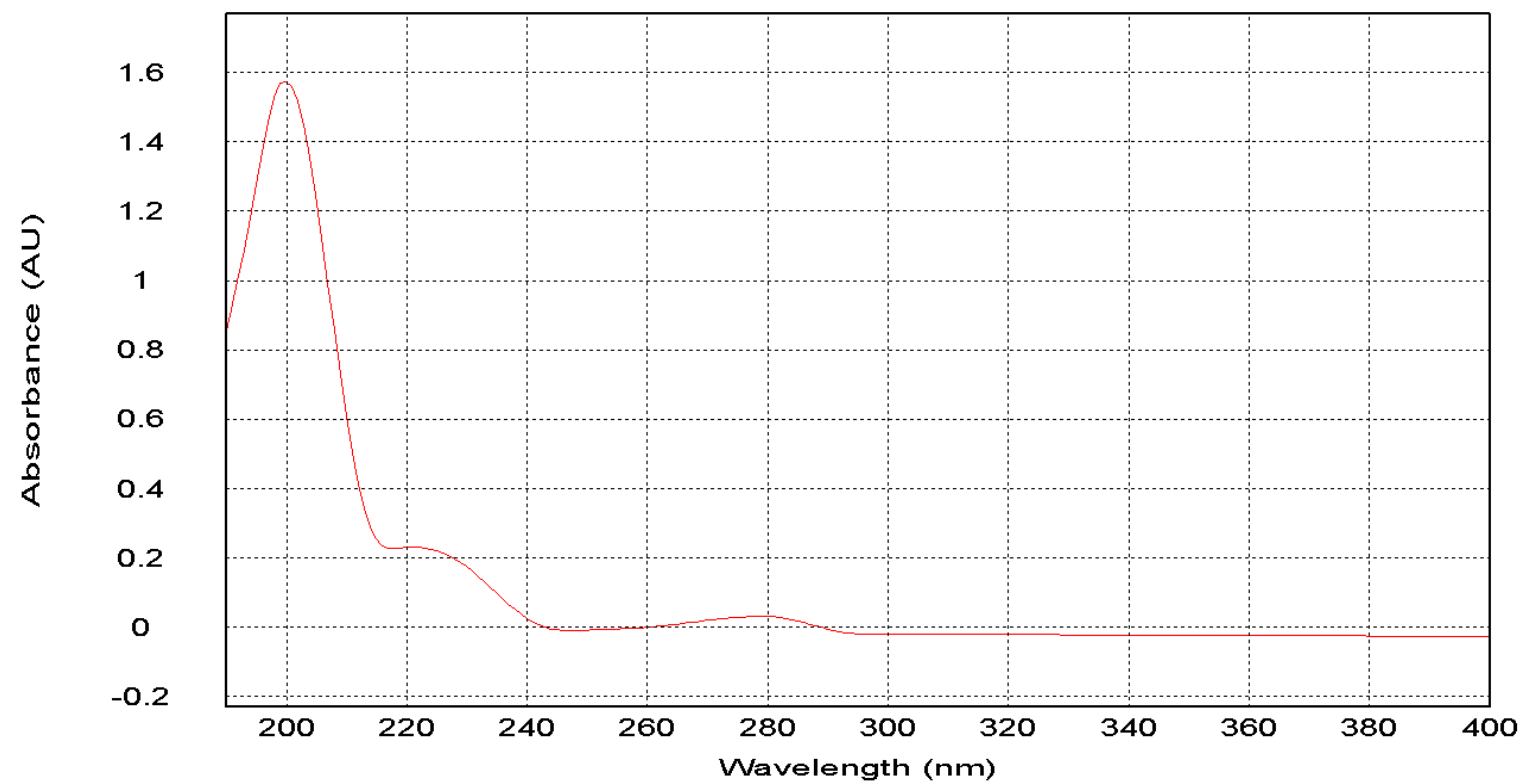

**Figure S21.** The UV spectrum of compound **3** in MeCN.

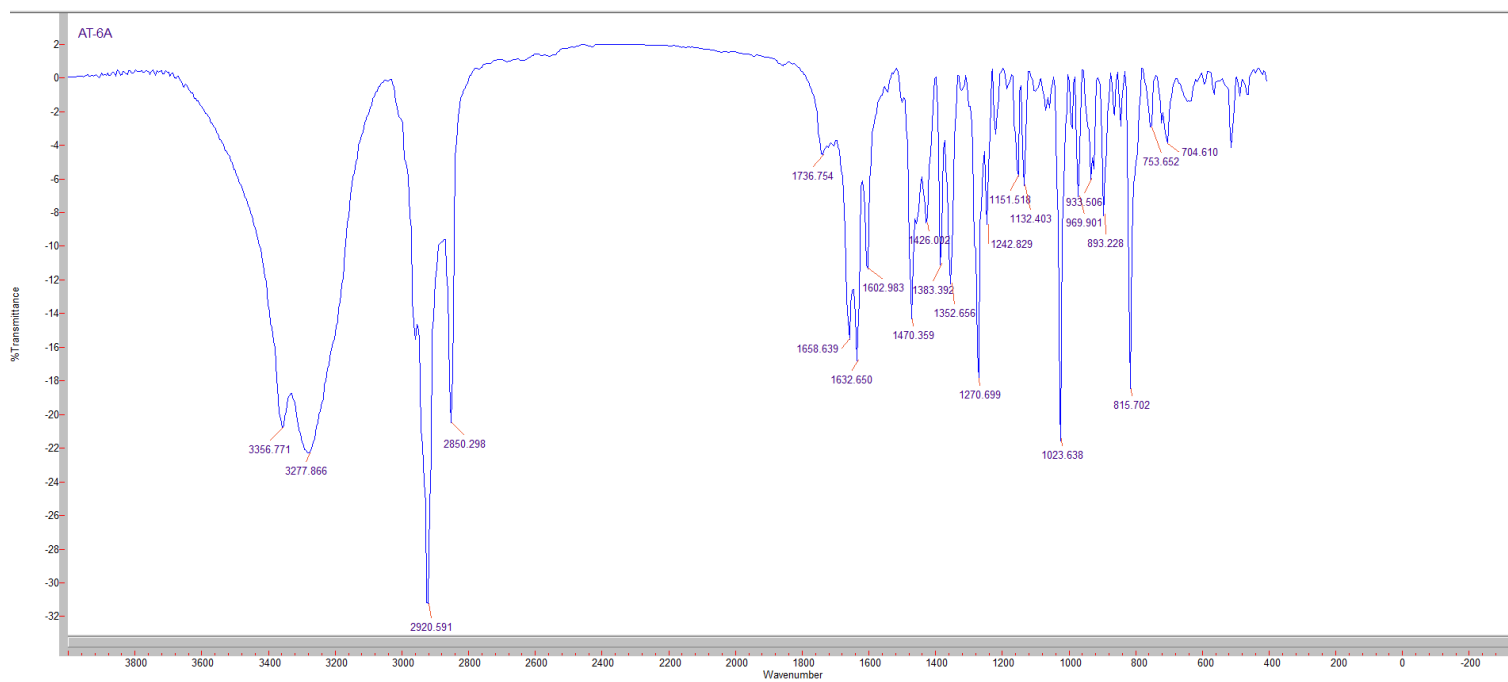

**Figure S22.** The IR Spectrum of Compound **3**.

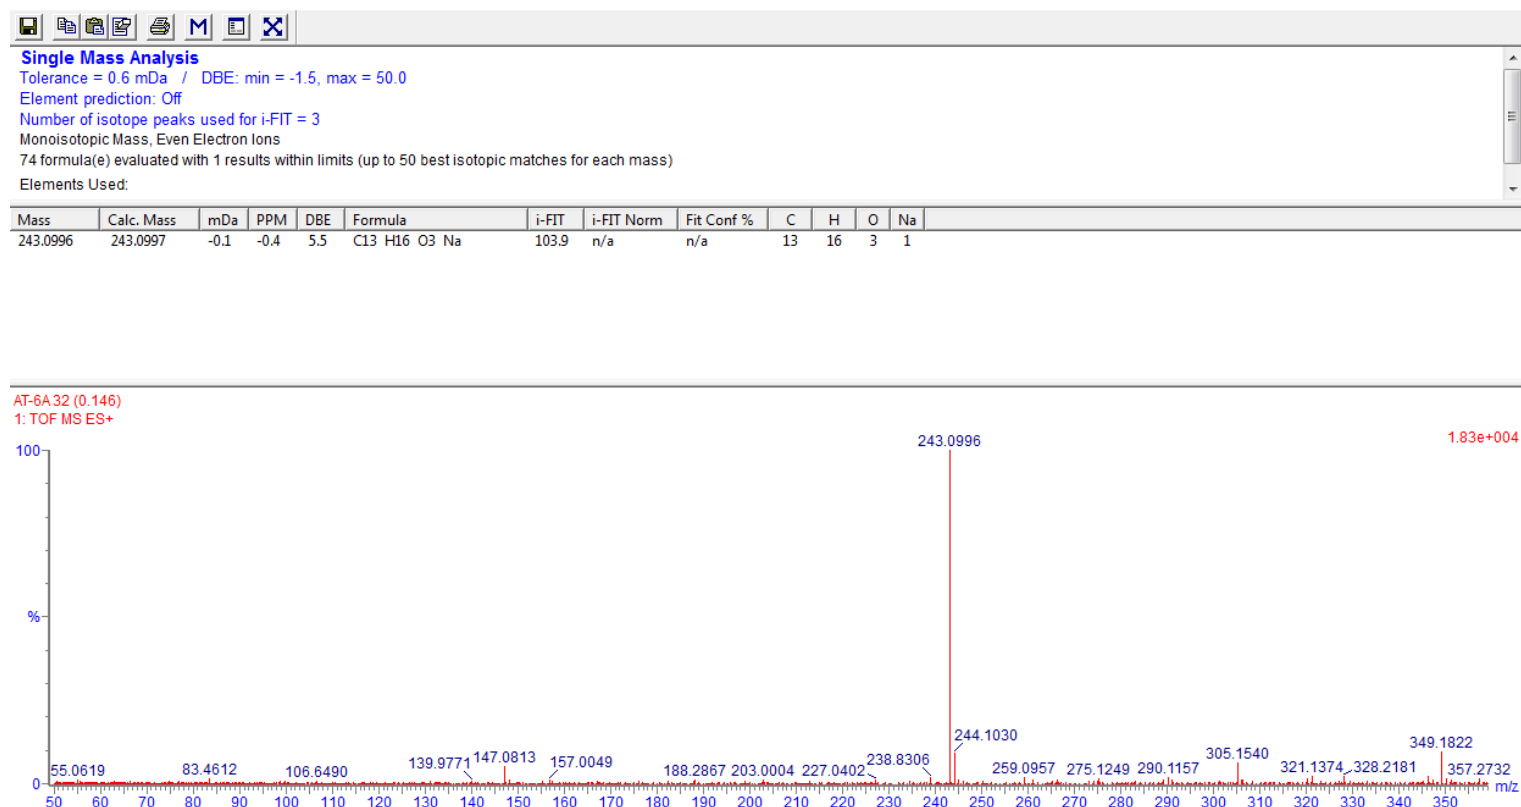

**Figure S23.** The (+)-HR-ESI-MS Spectroscopic Data of Compound **3**.

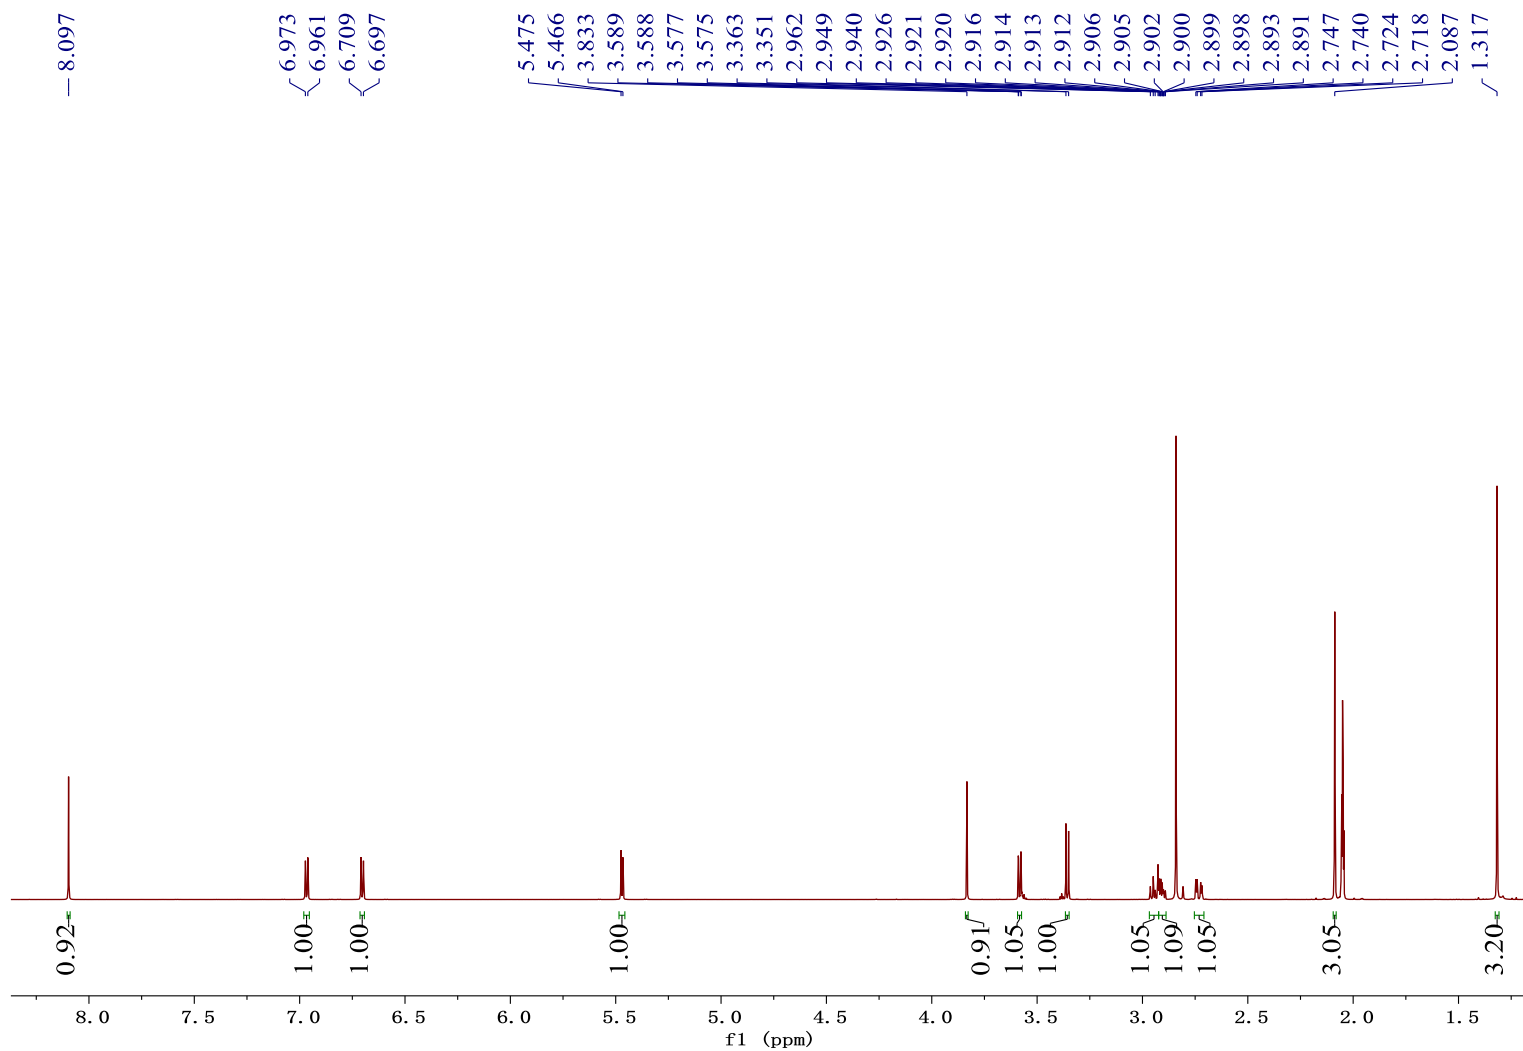

**Figure S24.** The  $^1\text{H}$  NMR Spectrum of Compound 3 in  $\text{Acetone-}d_6$ .

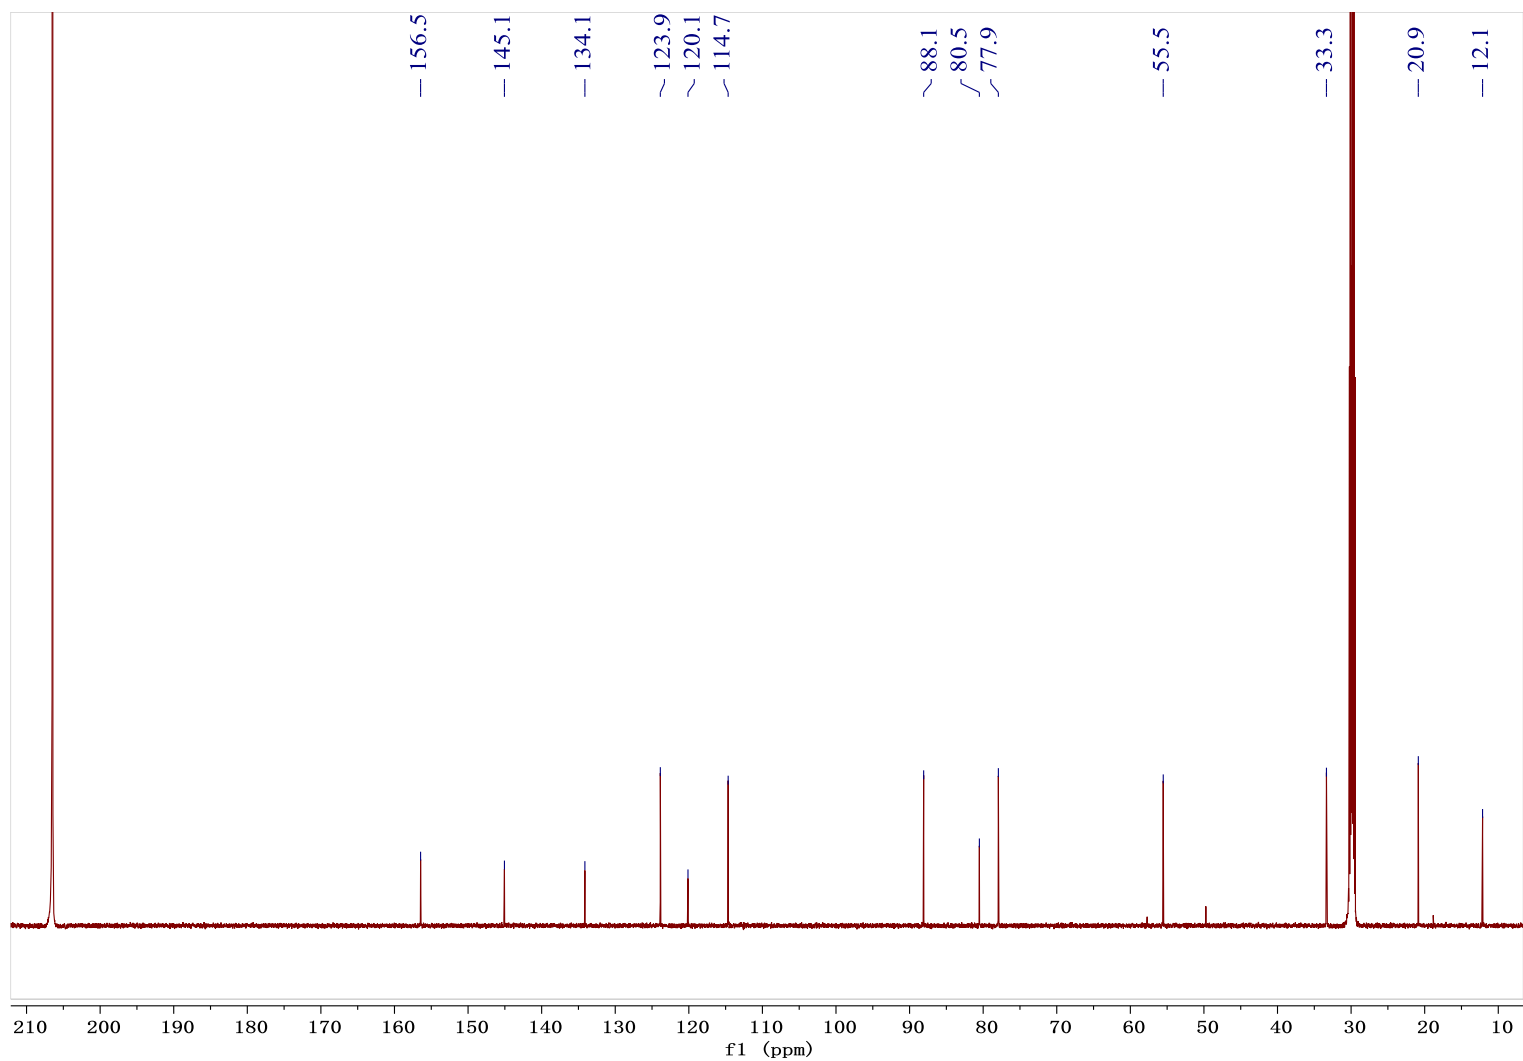

**Figure S25.** The  $^{13}\text{C}$  NMR Spectrum of Compound **3** in Acetone- $d_6$ .

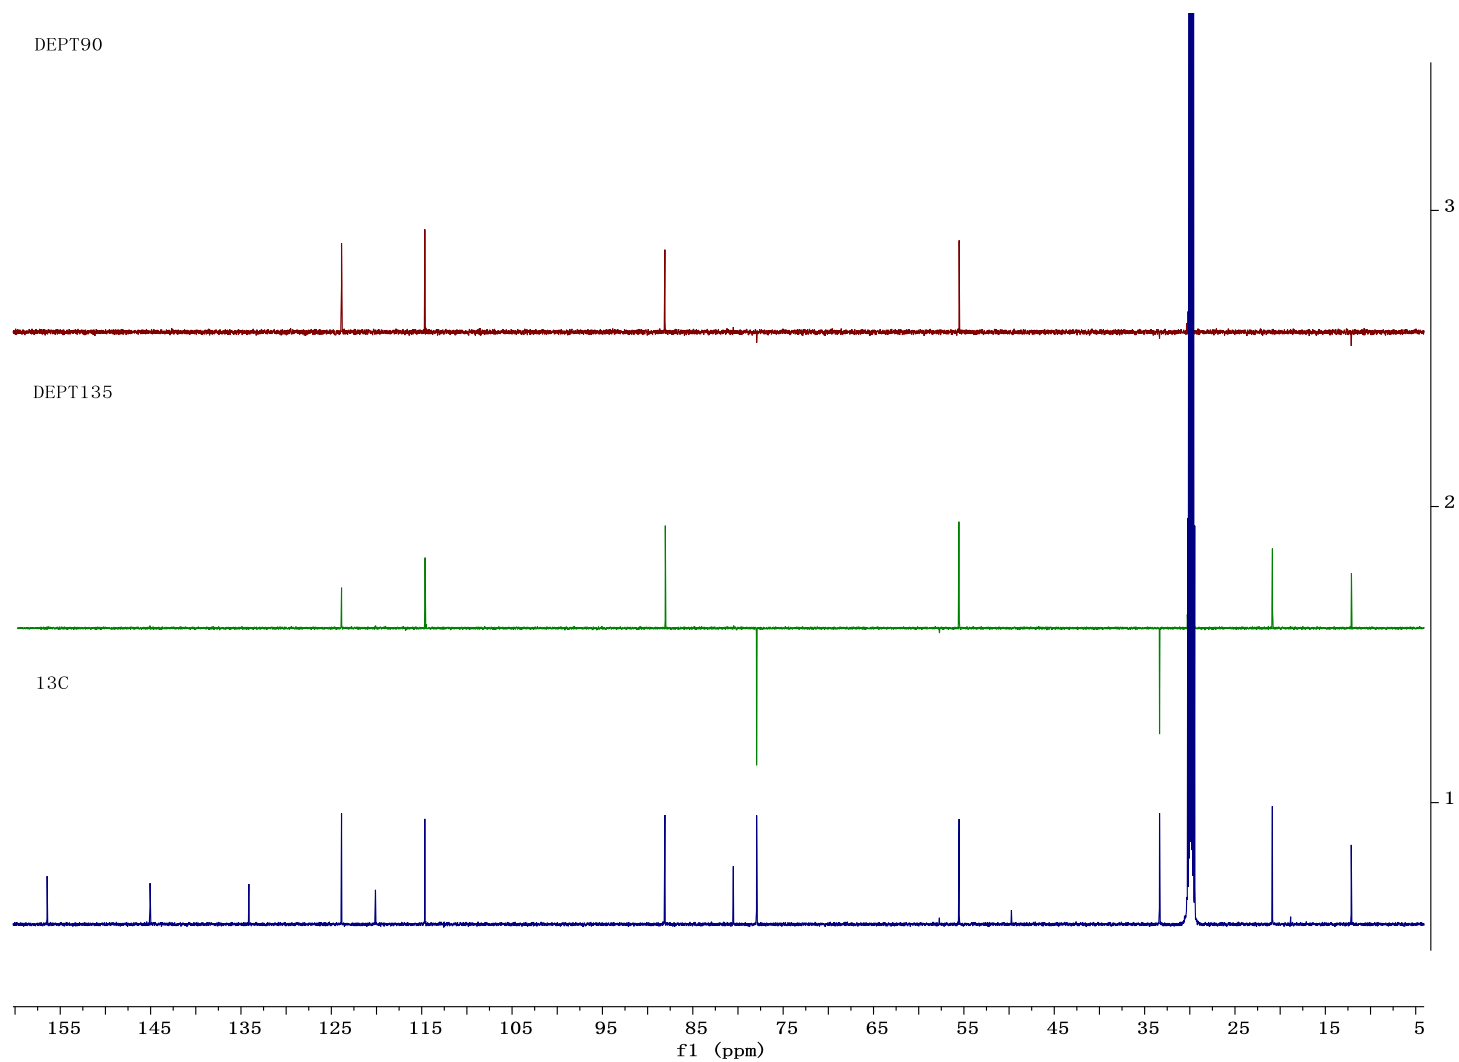

**Figure S26.** The DEPT Spectrum of Compound **3** in Acetone- $d_6$ .



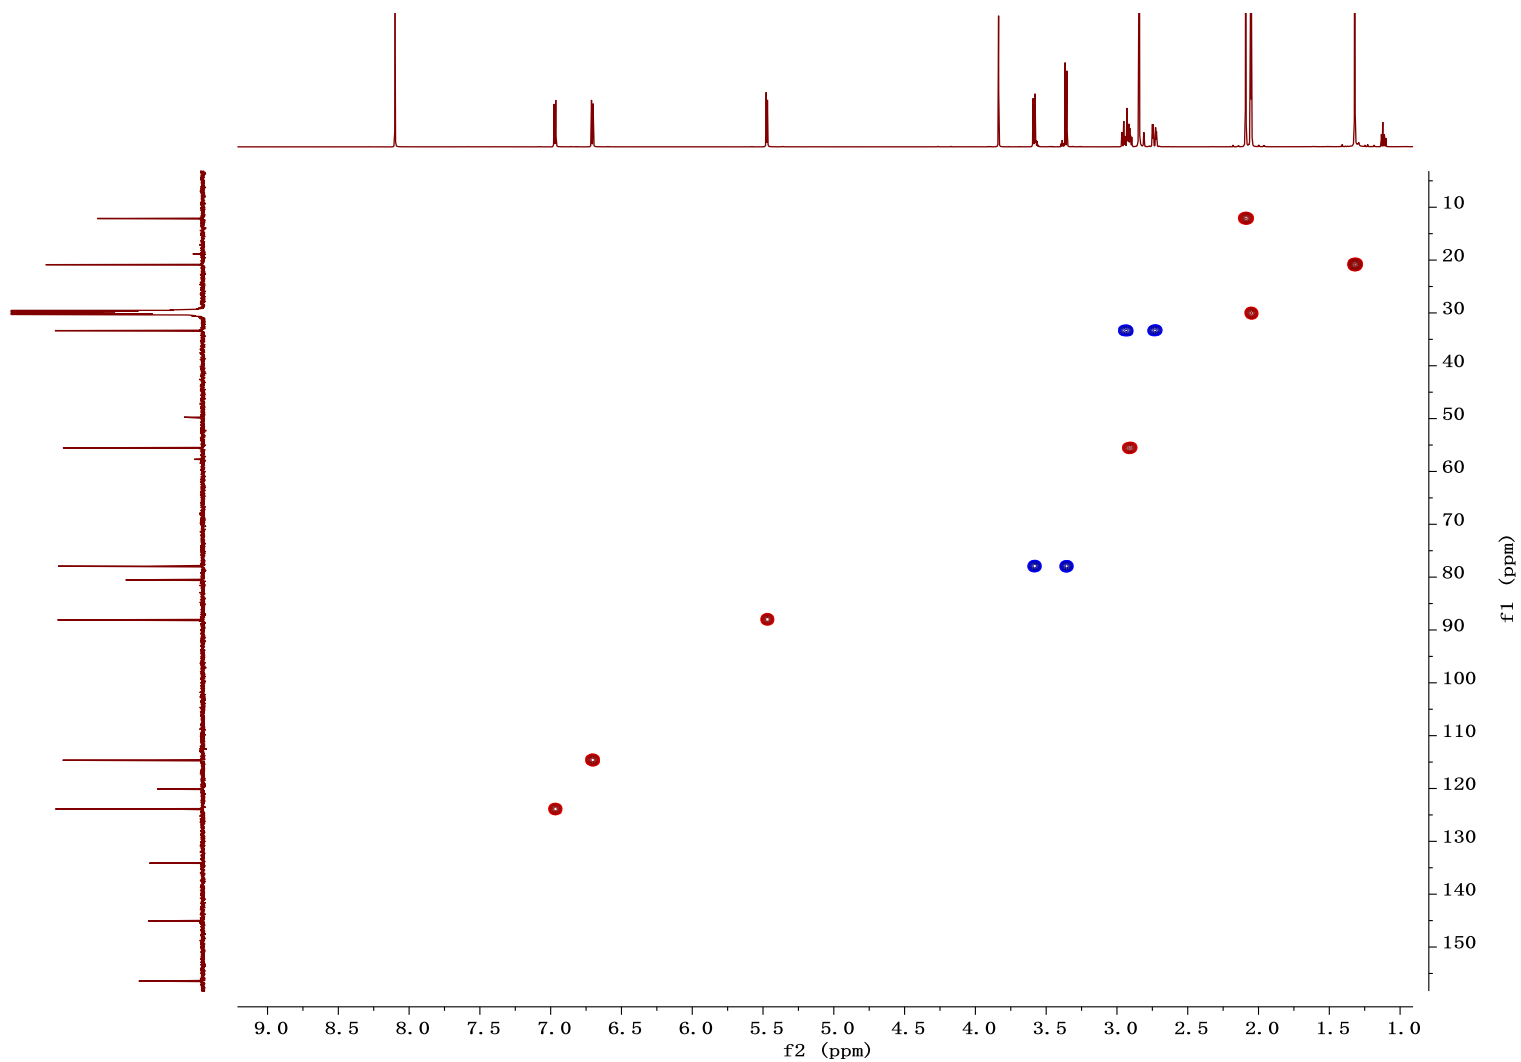

**Figure S27.** The edit-HSQC Spectrum of Compound **3** in Acetone- $d_6$ .

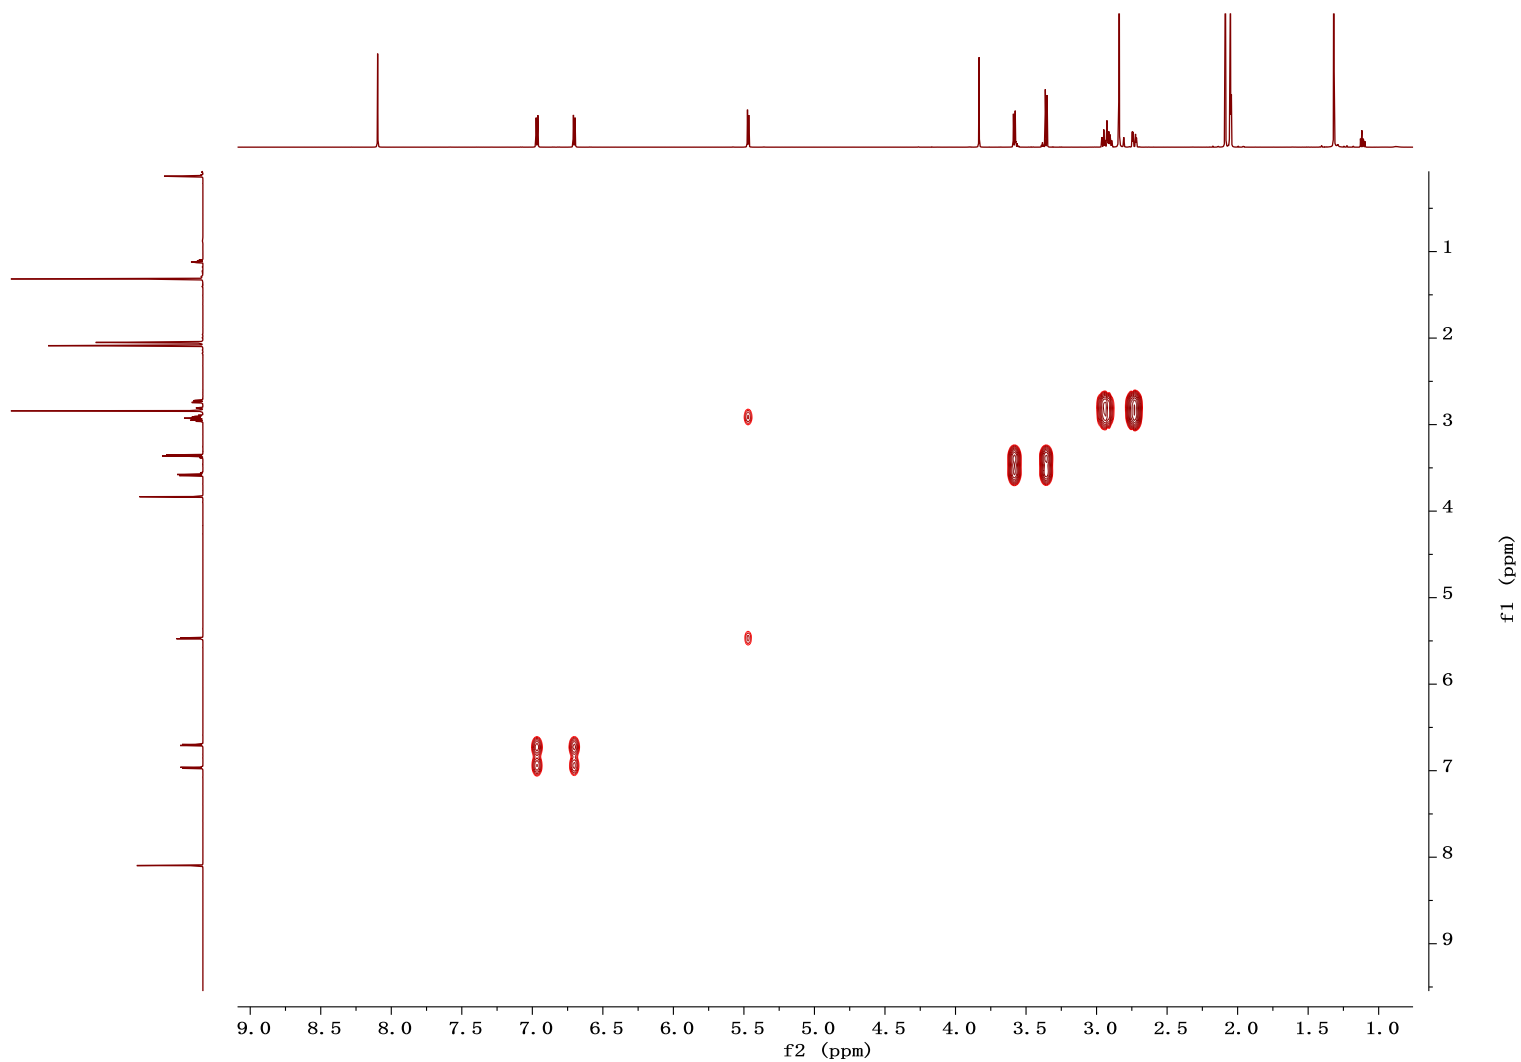

**Figure S28.** The  $^1\text{H}$ - $^1\text{H}$  COSY Spectrum of Compound **3** in Acetone- $d_6$ .

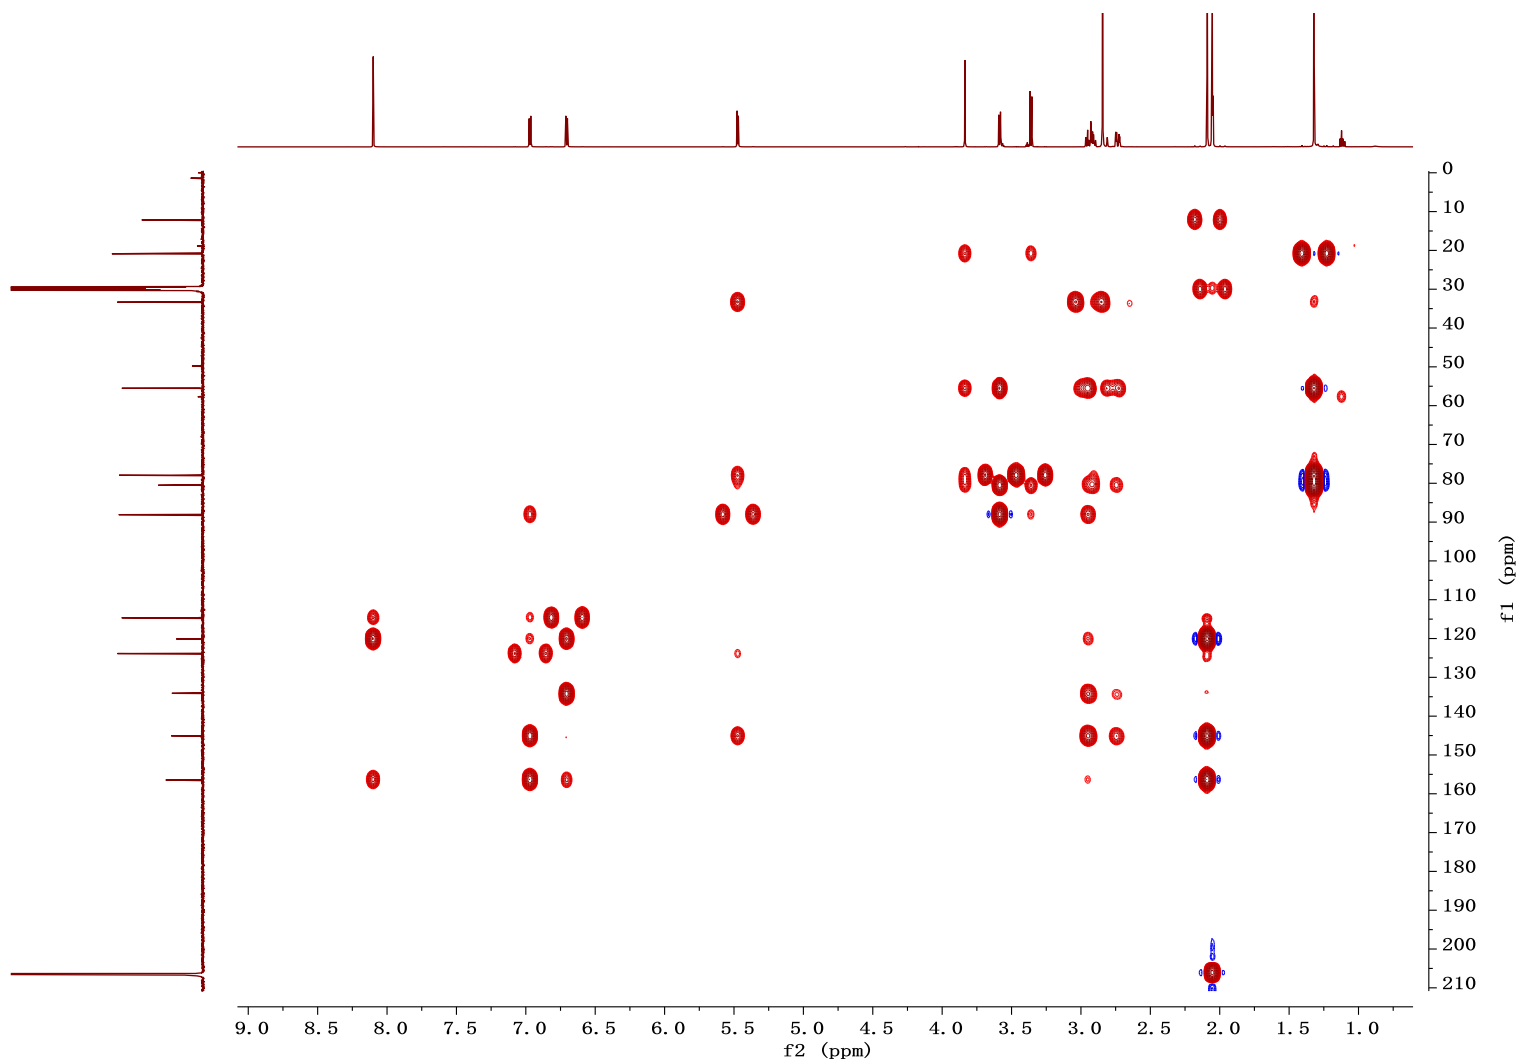

**Figure S29.** The HMBC Spectrum of Compound **3** in Acetone- $d_6$ .

1D Selective CSSF NOESY  
freq: 5.47ppm

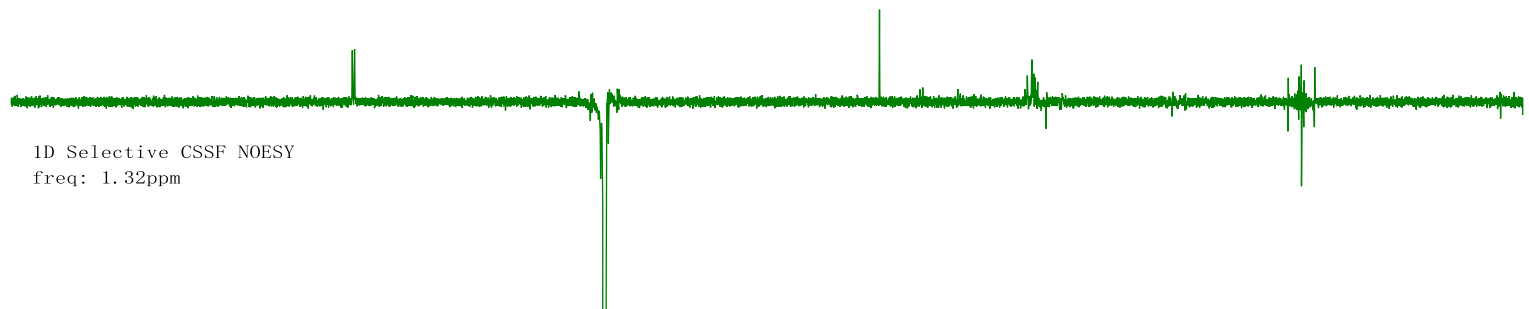

1D Selective CSSF NOESY  
freq: 1.32ppm

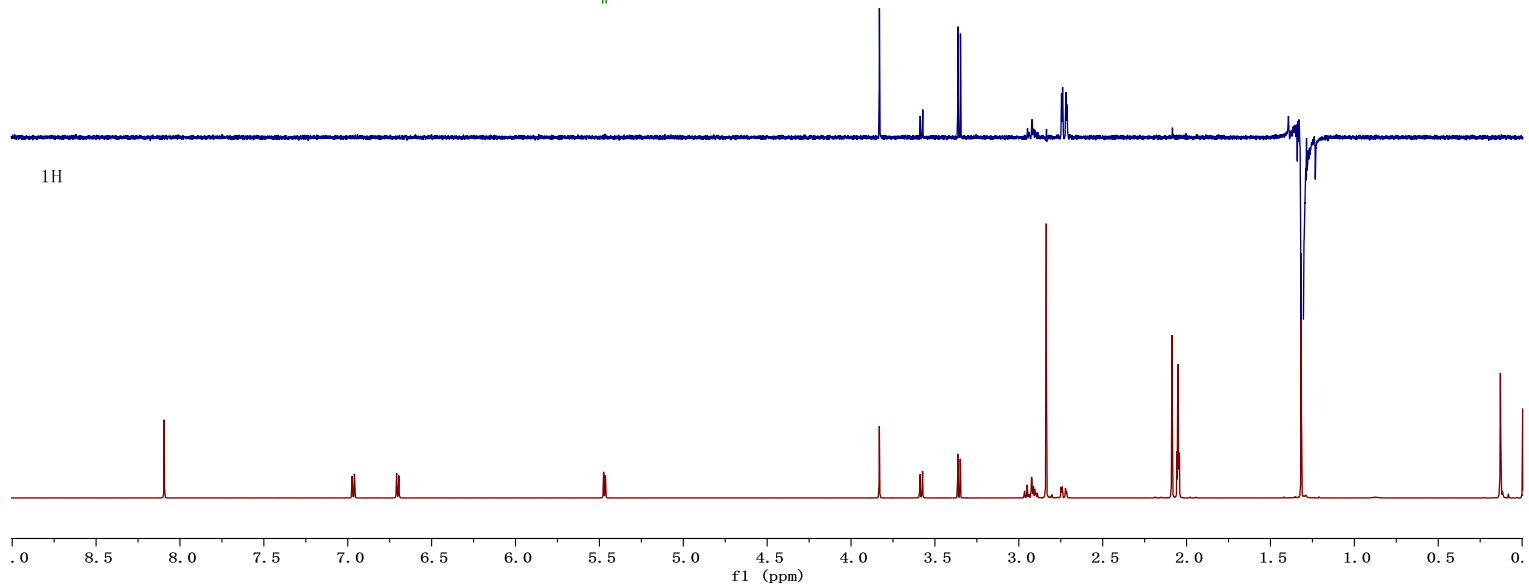

**Figure S30.** The 1D NOE Spectrum of Compound **3** in Acetone- $d_6$ .

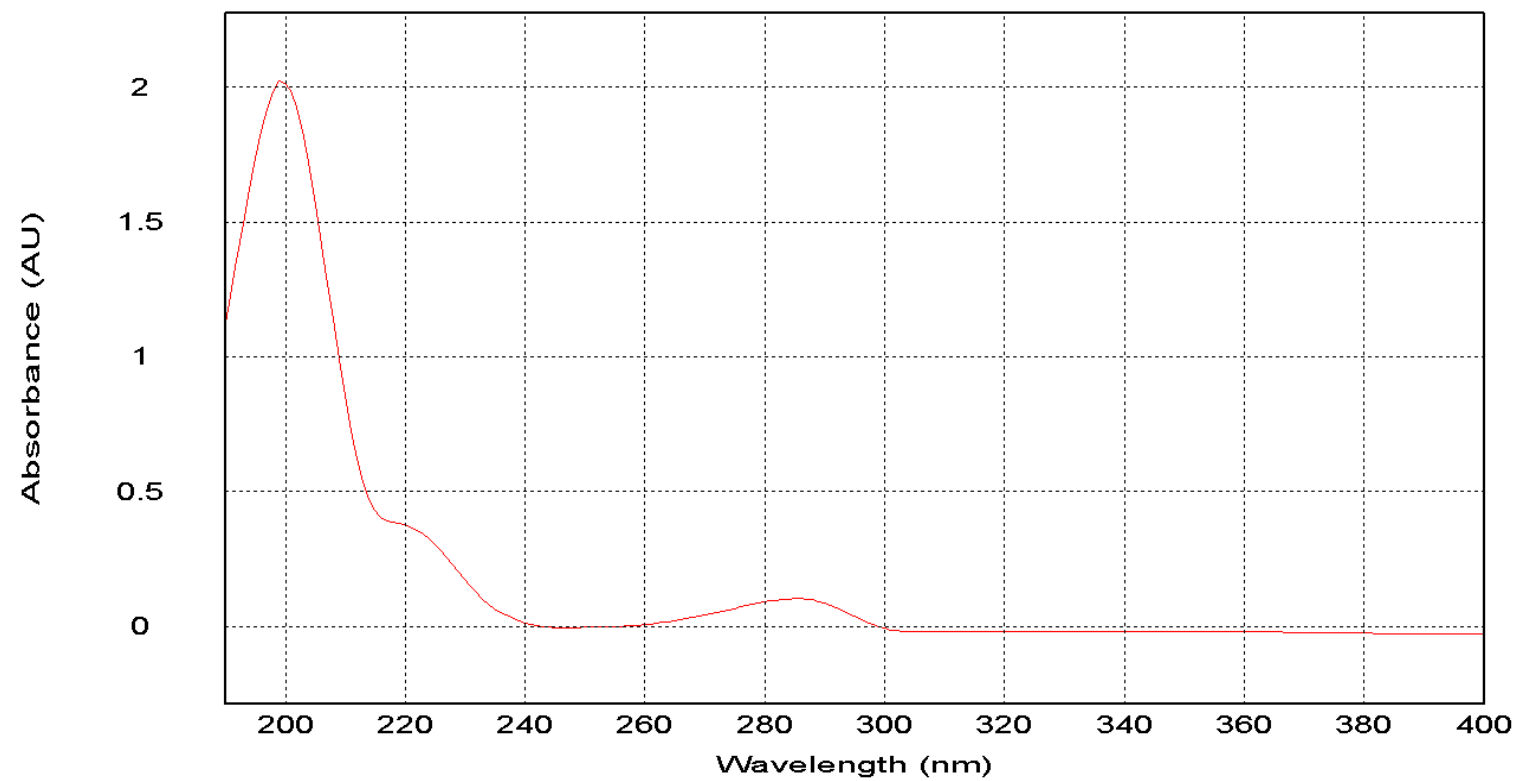

**Figure S31.** The UV spectrum of compound **4** in MeCN.

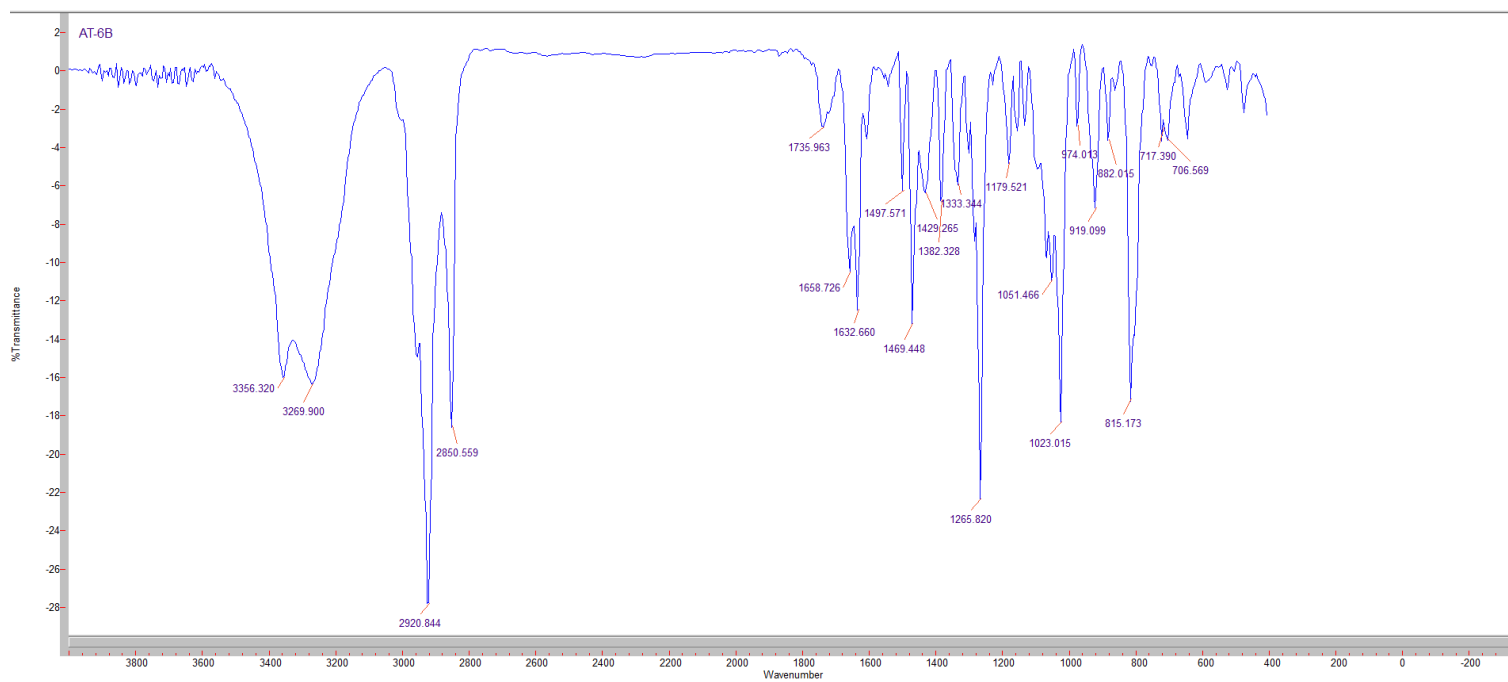

**Figure S32.** The IR Spectrum of Compound **4**.

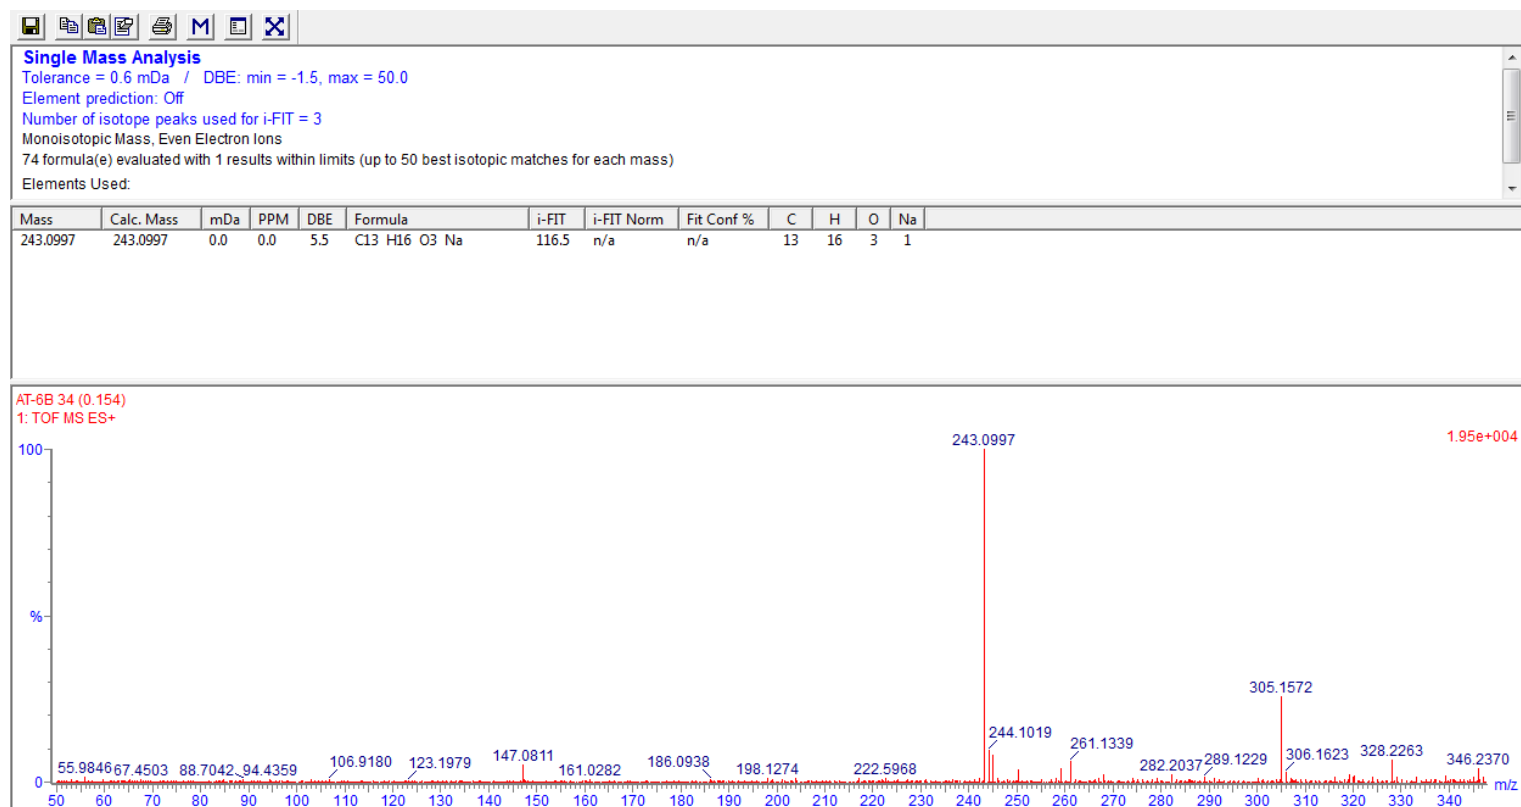

**Figure S33.** The (+)-HR-ESI-MS Spectroscopic Data of Compound **4**.

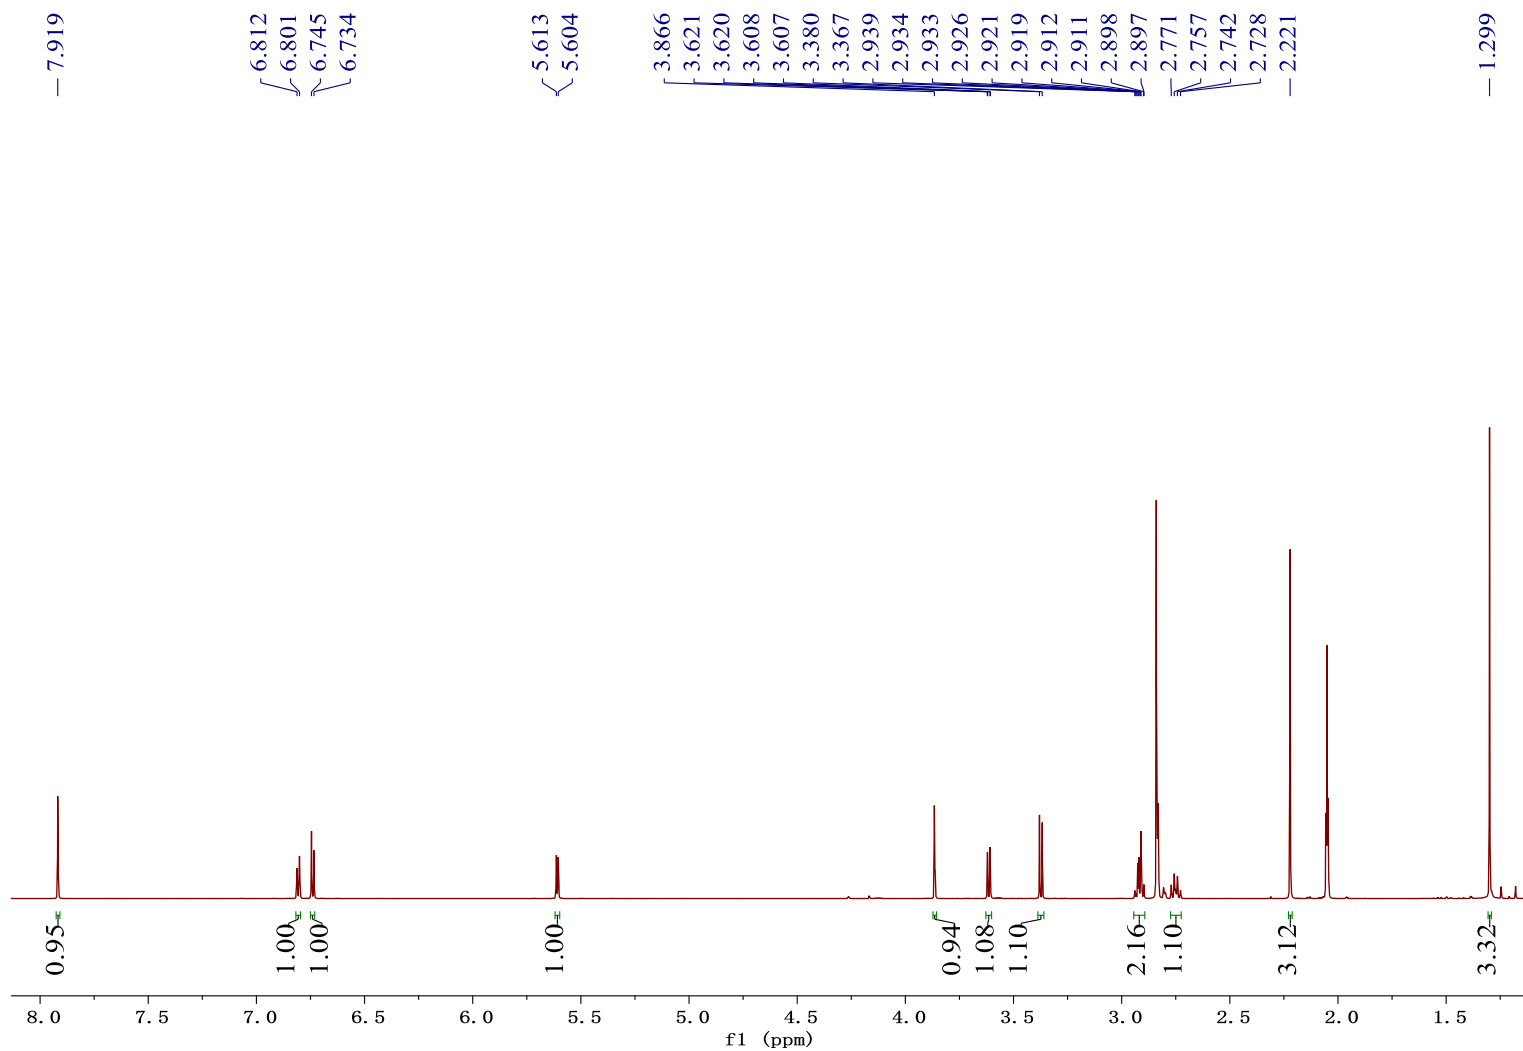

**Figure S34.** The  $^1\text{H}$  NMR Spectrum of Compound **4** in  $\text{Acetone-}d_6$ .



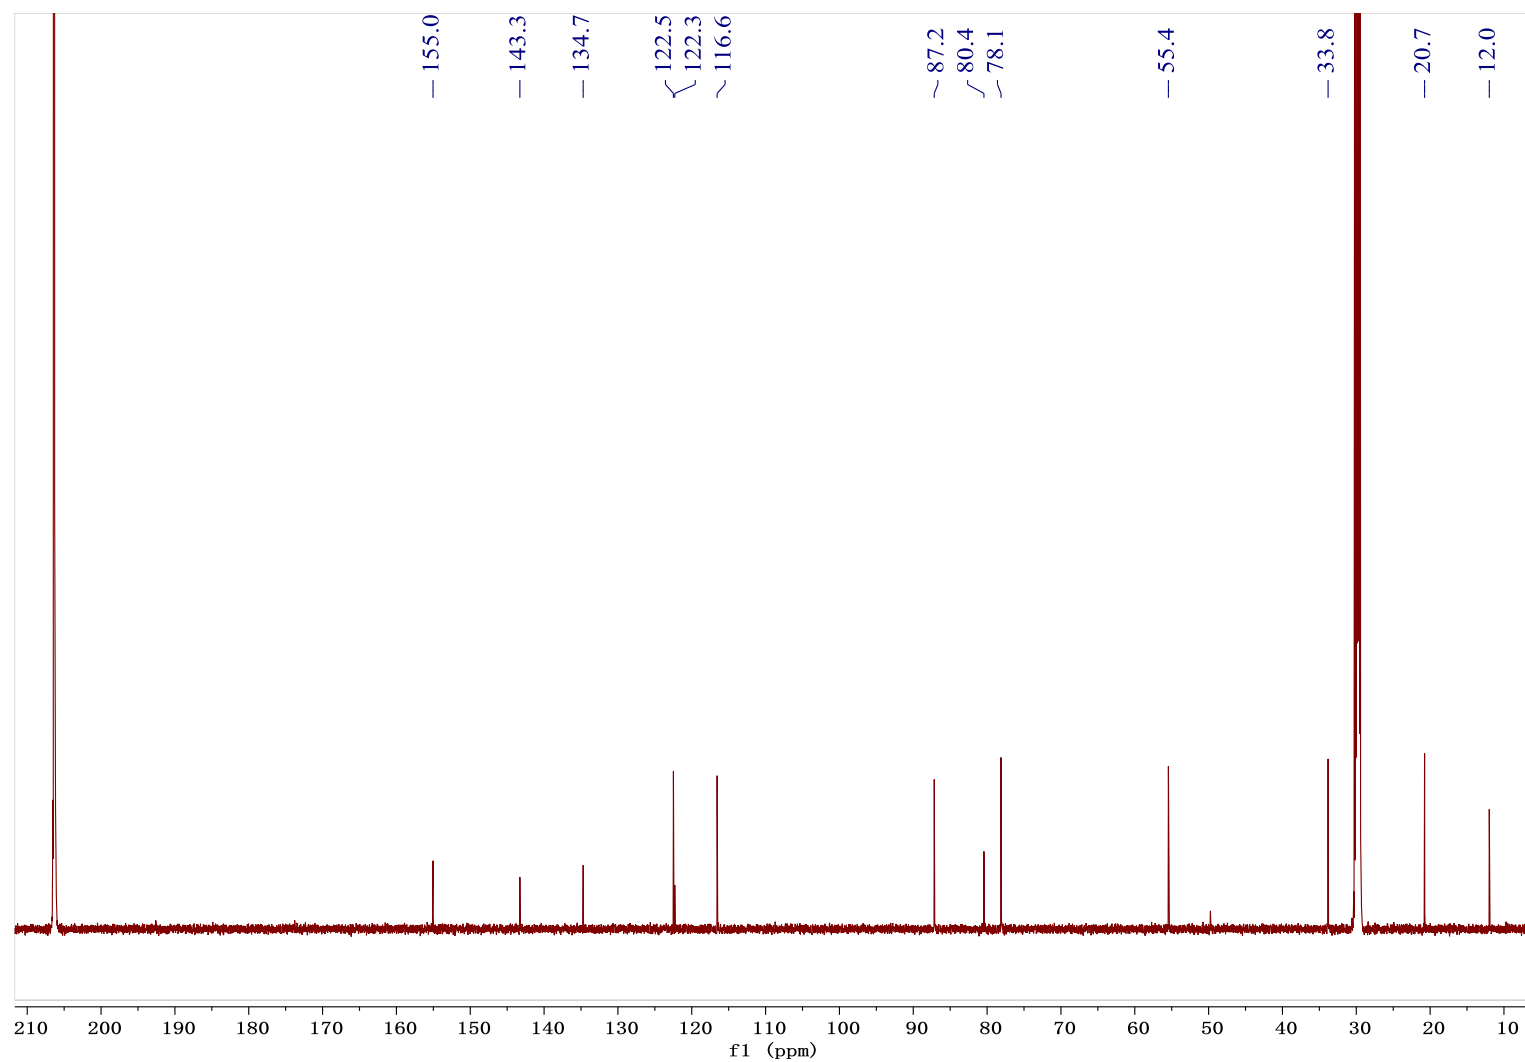

**Figure S35.** The <sup>13</sup>C NMR Spectrum of Compound **4** in Acetone-*d*<sub>6</sub>.

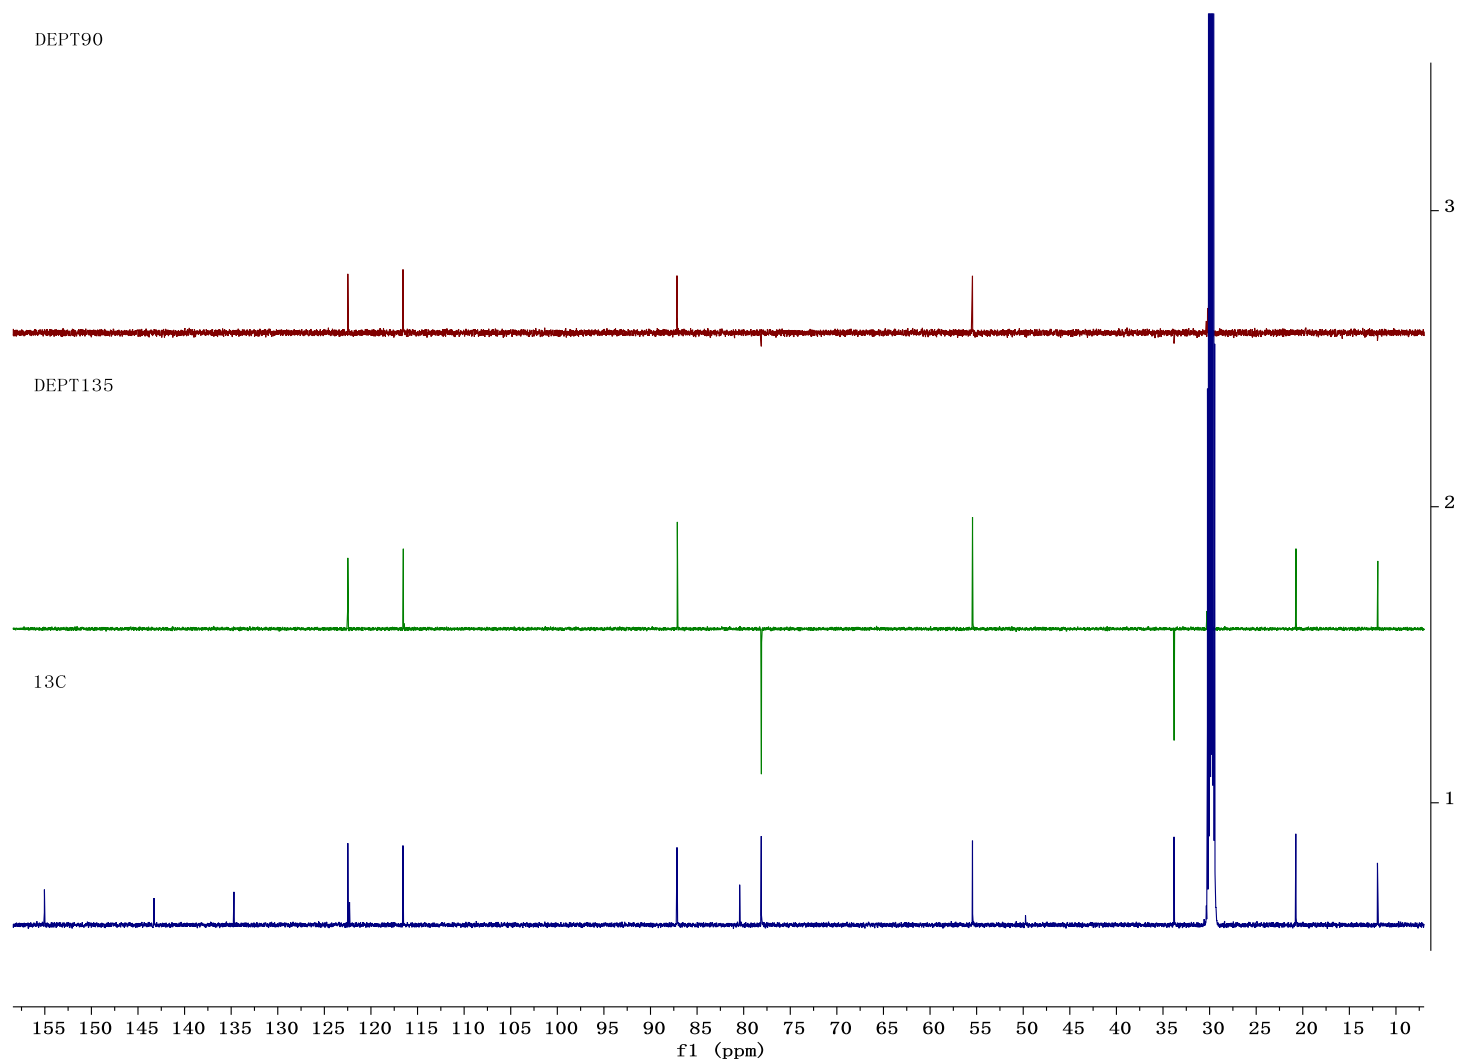

**Figure S36.** The DEPT Spectrum of Compound **4** in Acetone-*d*<sub>6</sub>.

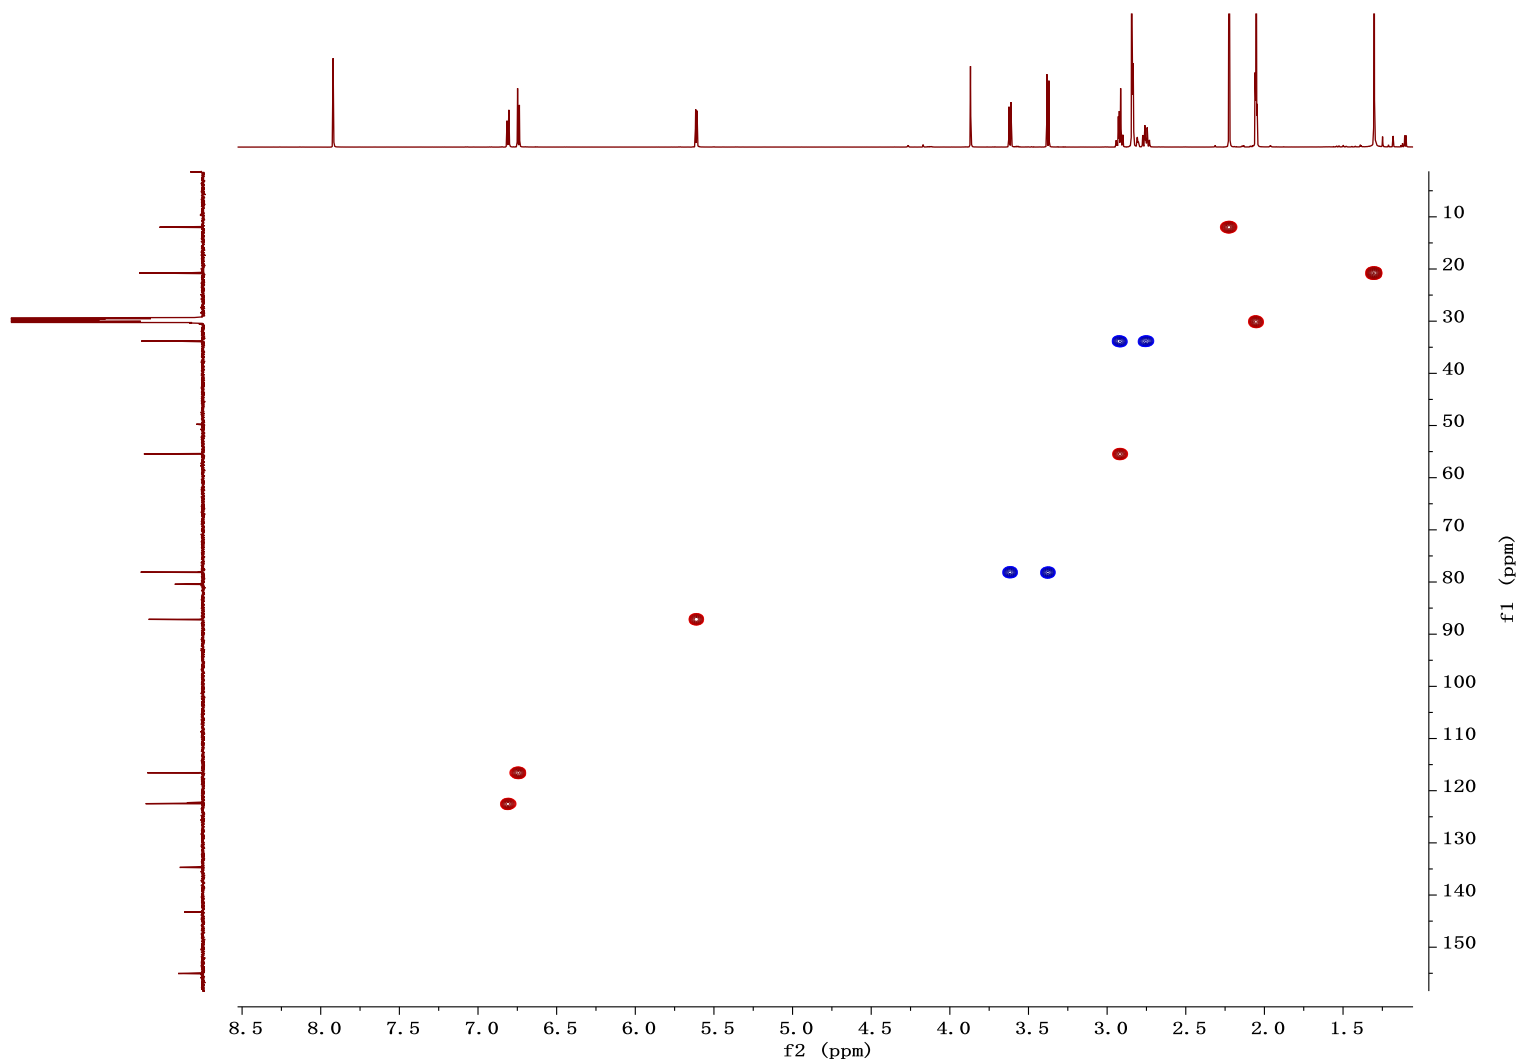

**Figure S37.** The edit-HSQC Spectrum of Compound **4** in Acetone- $d_6$ .

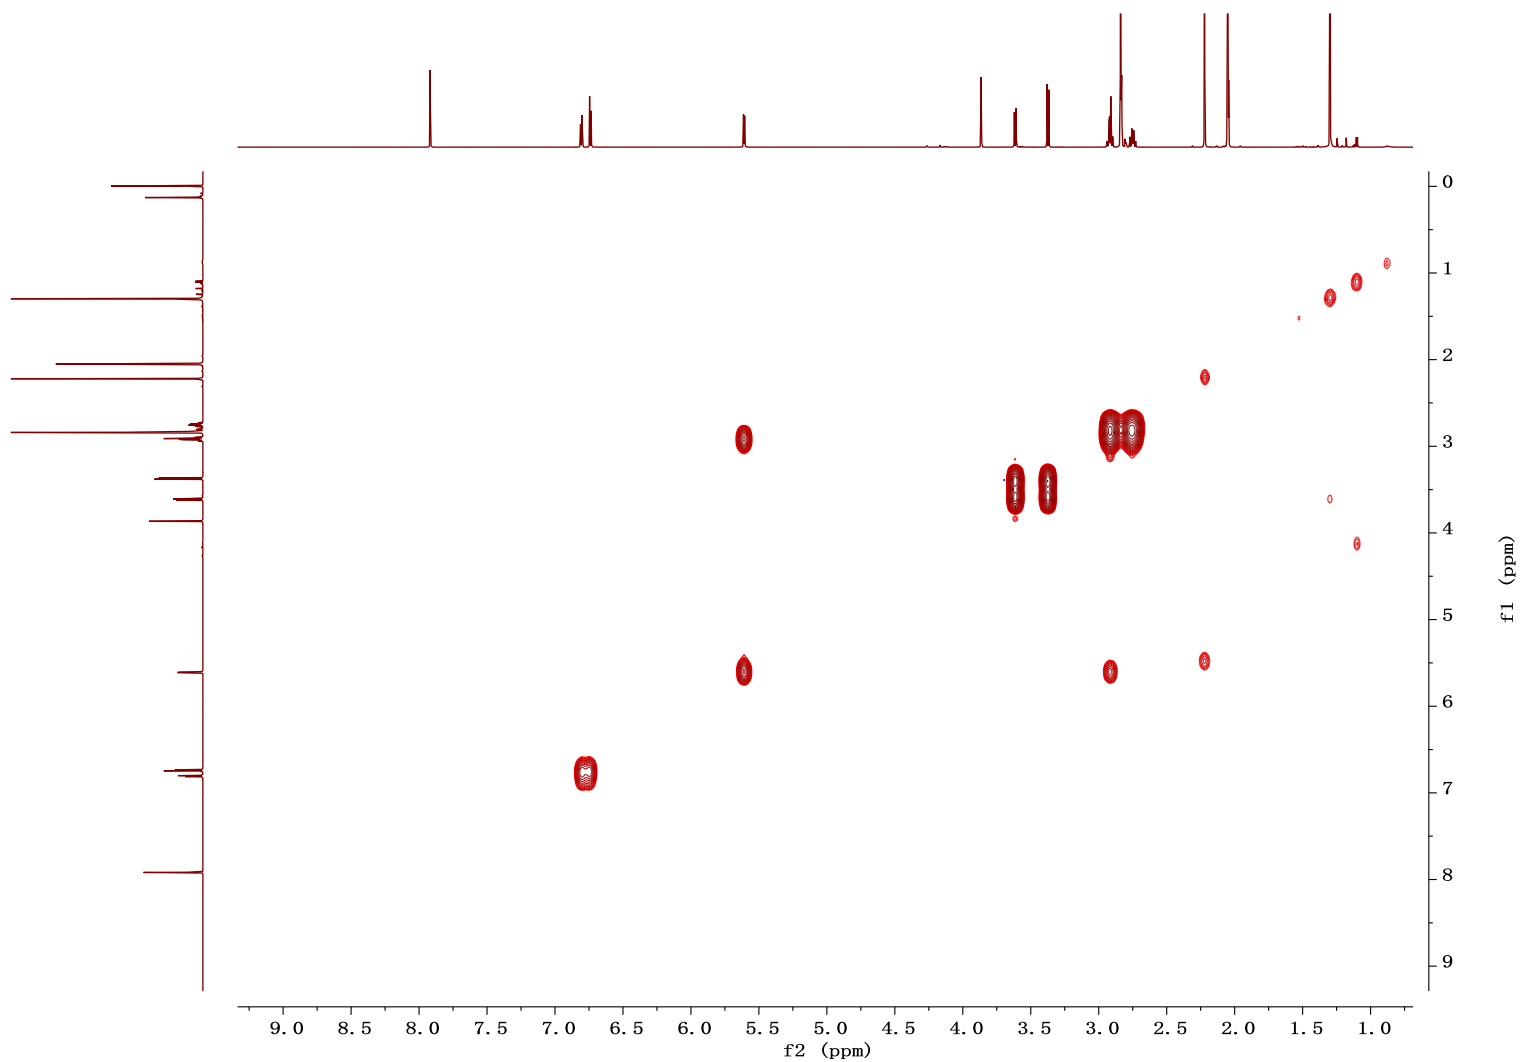

**Figure S38.** The  $^1\text{H}$ - $^1\text{H}$  COSY Spectrum of Compound **4** in  $\text{Acetone-}d_6$ .

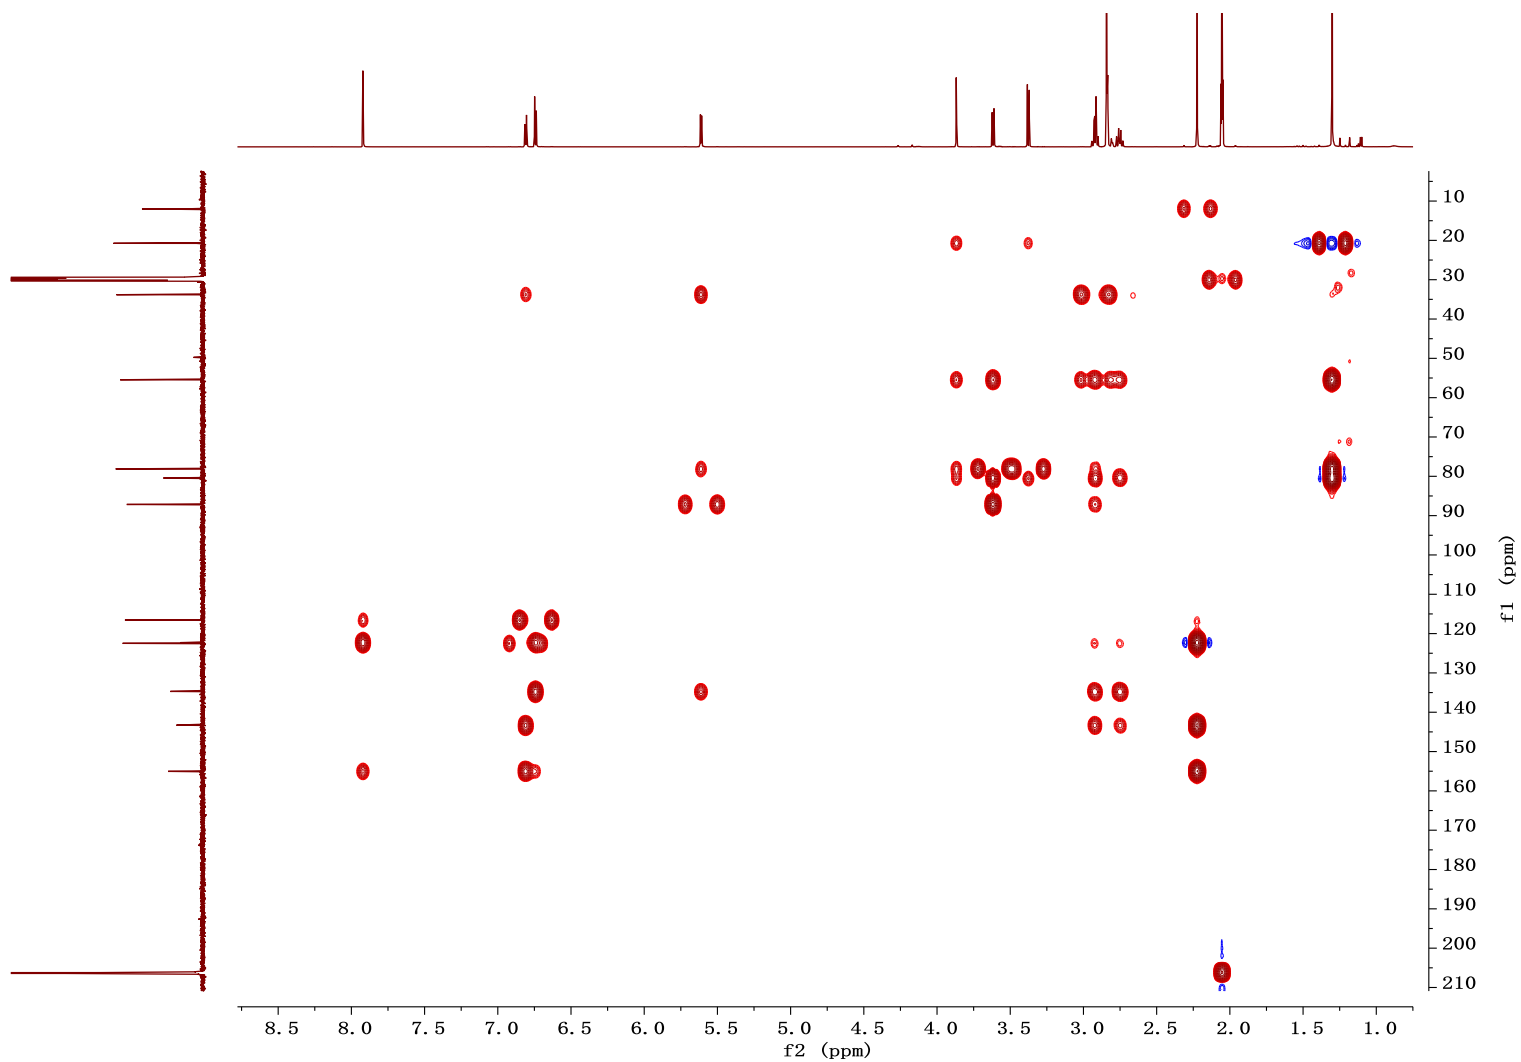

**Figure S39.** The HMBC Spectrum of Compound **4** in Acetone- $d_6$ .

1D Selective CSSF NOESY  
freq: 5.61ppm

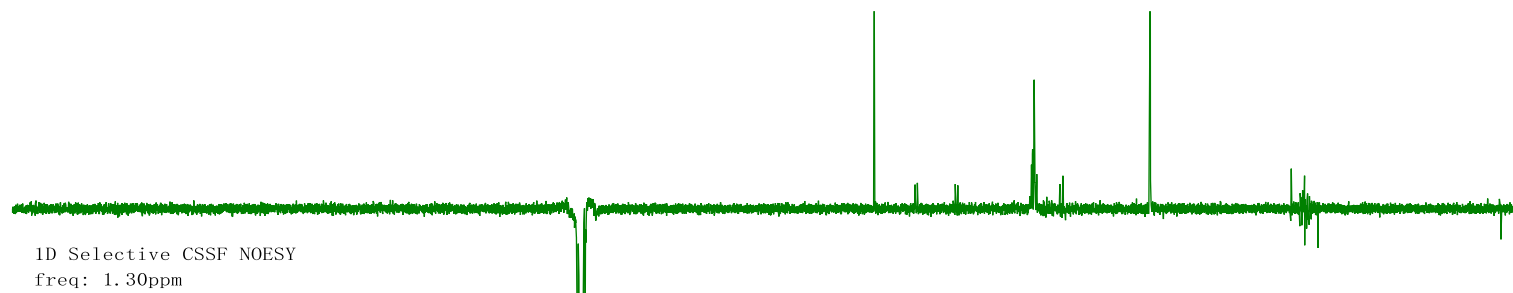

1D Selective CSSF NOESY  
freq: 1.30ppm

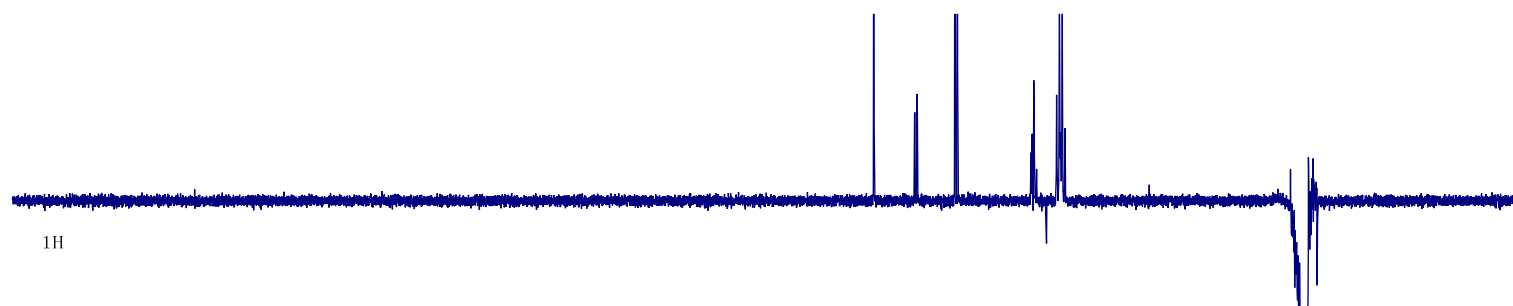

<sup>1</sup>H

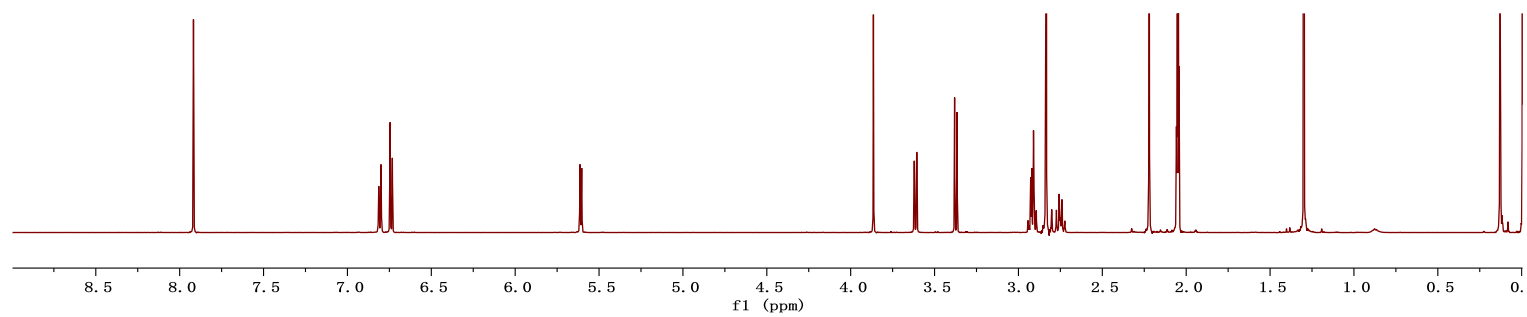

**Figure S40.** The 1D NOE Spectrum of Compound **4** in Acetone-*d*<sub>6</sub>.
